1                   **Antioxidant enriched fraction from *Pueraria tuberosa* alleviates**  
2                   **ovariectomized-induced osteoporosis in rats, and inhibits growth of breast**  
3                   **and ovarian cancer cell lines *in vitro***

4                   **Swaha Satpathy<sup>1\*#</sup>, Arjun Patra<sup>1</sup>, Muhammad Delwar Hussain<sup>2\*</sup>, Mohsin Kazi<sup>3</sup>,**  
5                   **Mohammed S Aldughaim<sup>4</sup>, Bharti Ahirwar<sup>1</sup>**

6                   <sup>1</sup>Institute of Pharmacy, Guru Ghasidas University, Bilaspur (C.G.), India

7                   <sup>2</sup>Department of Pharmaceutical & Biomedical Sciences, College of Pharmacy, California Health  
8                   Sciences University, Clovis, California, USA

9                   <sup>3</sup>Department of Pharmaceutics, College of Pharmacy, King Saud University, Riyadh 11451,  
10                   Saudi Arabia

11                   <sup>4</sup>Research Center, King Fahad Medical City, Riyadh 11525, Saudi Arabia

12                   ***\*Corresponding author:***

13                   Dr. Swaha Satpathy, Institute of Pharmacy, Guru Ghasidas University, Bilaspur-495009

14                   Chhattisgarh, India; E-mail: [swaha22@rediffmail.com](mailto:swaha22@rediffmail.com); Phone Number: +91 7000307484

15                   ***And***

16                   Prof. Muhammad Delwar Hussain, Department of Pharmaceutical & Biomedical Sciences,  
17                   College of Pharmacy, California Health Sciences University, Clovis 93612, California, USA; E-  
18                   mail: [dhussain@chsu.edu](mailto:dhussain@chsu.edu)

19                   **#Present address:** Department of Biotechnology & Bioinformatics, Sambalpur University,  
20                   Burla, Sambalpur, Odisha, India.

21

22

23

## 24 **Abstract**

25 *Pueraria tuberosa* (*P. tuberosa*), known as Indian Kudzu belongs to family Fabaceae and it is  
26 solicited as “Rasayana” drugs in Ayurveda. In the present study, we analyzed the efficacy an  
27 antioxidant enriched fraction (AEF) from the tuber extract of *P. tuberosa* against menopausal  
28 osteoporosis and breast and ovarian cancer cell lines. The AEF from *P. tuberosa* was identified  
29 by determining phenolic composition (total phenolic and flavonoid amount). Antioxidant  
30 property (*in vitro* assays) was also carried out followed by analysis of the AEF for its  
31 antiosteoporotic and anticancer potentials. Antiosteoporotic activity of AEF was investigated in  
32 ovariectomy-induced osteoporosis in rats and *in vitro* anticancer activity by MTT assay. Also,  
33 the GC/MS analysis of AEF was performed to determine various phytoconstituents. A docking  
34 analysis was performed to verify the interaction of bioactive molecules with estrogen receptors  
35 (ERs). Ethyl acetate fraction of the mother extract was proved as the AEF. AEF significantly  
36 improved various biomechanical and biochemical parameters in a dose dependent manner in the  
37 ovariectomized animals. AEF also controlled the increased body weight and decreased uterus  
38 weight following ovariectomy. Histopathology of femur revealed the restoration of typical bone  
39 structure and trabecular width in ovariectomized animals after AEF and raloxifene treatment.  
40 AEF also exhibited *in vitro* cytotoxicity in breast (MCF-7 and MDA-MB-231) and ovarian  
41 (SKOV-3) cancer cells. Further, genistein and daidzein exhibited a high affinity towards both  
42 estrogen receptors ( $\alpha$  and  $\beta$ ) in docking study revealing the probable mechanism of the  
43 antiosteoporotic activity. GC/MS analysis confirmed the presence of bioactive molecules such as  
44 stigmasterol,  $\beta$ -sitosterol, and stigmasta-3,5-dien-7-one. The observations of this study vindicate  
45 the potency of AEF from *P. tuberosa* in the treatment of menopausal osteoporosis and cancer.

46 **Keywords:** Anticancer activity; Antiosteoporotic activity; Antioxidant enriched fraction;  
47 Docking study; *Pueraria tuberosa*; Ovariectomy.

48

## 49 **Introduction**

50 World Health Organization defines osteoporosis as a decrease of bone mineral density (BMD) to  
51 greater than 2.5 standard deviations of the standard reference for BMD in young health women  
52 [1]. Osteoporosis deteriorates BMD, bone architectural structure and enhances the risk of  
53 fracture. In addition, osteoporosis causes severe problems to human's quality of life, such as  
54 disability, loss of living ability, and even death [2]. Variation in bone forming (osteoblastic) and  
55 bone resorbing (osteoclastic) cell function causes osteoporosis [3]. Osteoporosis has the highest  
56 prevalence in senile people and severely affects about 50% of menopausal women worldwide.  
57 The expected adult population over 60 years in India by 2050 would be 315 million signifying  
58 more incidence of osteoporosis compared to 26 million in 2003 [4]. A decrease in the level  
59 estrogen is the key contributing feature for menopausal osteoporosis (MO) in women. The  
60 reduced estrogen causes diminished bone formation, enhanced bone resorption, and elevated  
61 production of proinflammatory cytokines such as IL-1, IL-6, IL-7, and TNF- $\alpha$  [5]. The  
62 occurrence of MO is increasing day by day because of deskbound life style, environmental  
63 vulnerability, amenorrhea, hormonal alterations, early inception of puberty and ovarian disorders  
64 [6, 7]. Furthermore, several studies have demonstrated oxidative stress as an imperative factor  
65 prevalence of MO as a shortage of estrogen declines the antioxidant defense, and this lowered  
66 antioxidant levels promote bone loss [8, 9]. Oxidative stress could reduce the life span of  
67 osteoblasts by inhibiting osteoblastic differentiation and promoting bone resorption by boosting  
68 development and activity of osteoclasts, thus causing osteoporosis. In MO, the activated

69 osteoclasts produce reactive oxygen species like superoxides and rise in malondialdehyde level  
70 in blood. These oxidative stresses also contribute to bone loss in osteoporosis [4]. Antioxidants  
71 can be useful in the management of MO by normalizing the altered osteoblastic and osteoclastic  
72 functions [10].

73         Several drugs, such as estrogens, biphosphonates, and parathyroid hormone analogs are  
74 used for the inhibition and management of osteoporosis. They promote bone formation or  
75 decrease bone resorption or both [11]. However, these treatments comprise serious concerns  
76 related to their safety and efficacy. Estrogen therapy is not preferred in patients with hepatopathy  
77 and venous embolism. Also, the possibility of cancers (breast, cervical, ovary), heart disease, and  
78 stroke are high in long-term use of estrogen [12]. Long-term application of biphosphonates  
79 shows adverse effects such as osteonecrosis of the jaw and atypical femoral fractures [13].  
80 Parathyroid hormone analogs are costly, with patients needing daily injection, and may cause  
81 adverse consequence like osteosarcoma [14]. Therefore, it is important to develop drugs from  
82 plant origin with that have a protective effect on bone loss with fewer side effects. These plant-  
83 derived estrogenic compounds are known as “Phytoestrogens” and are accepted worldwide as  
84 safe treatments [7]. The phytoestrogens mostly include isoflavones, isoflavanones, coumestans,  
85 flavanones, chalcones, and flavones [15]. A considerable number of plant drugs in the form of  
86 extracts, fractions, herbal preparations, and isolated molecules have been studied to prevent or  
87 control osteoporosis [16]. Although these plant derived remedies are helpful in the management  
88 of MO, they may produce the side effects of supplemental estrogen [17, 18]. Hence, a search for  
89 safe, cheap, and effective natural agents for the management of MO is required.

90         Different species of Pueraria such as *P. lobata*, *P. mirifica*, *P. candollei* var. *mirifica* have  
91 been studied as protective agents against bone loss [19-21]. *Pueraria tuberosa*, known as Indian

92 Kudzu belongs to family fabaceae, is solicited as “Rasayana” drugs in Ayurveda. This plant is  
93 used in various Ayurvedic preparations, traditional management of a wide range of ailments, and  
94 explored scientifically for an array of pharmacological activities. The plant is a rich source of  
95 various secondary metabolites and contains phytoestrogenic compounds such as quercetin,  
96 genistein, and daidzein [22]. Despite the significant pharmacological and phytochemical  
97 potential, the antiosteoporotic activity of *P. tuberosa* has not been explored. Our objective was to  
98 identify an antioxidant enriched fraction (AEF) from the tubers of the plant, and to investigate  
99 the preventive effect of AEF in menopausal osteoporosis and anticancer activity.

## 100 **Materials and Methods**

### 101 **Chemicals, reagents and kits**

102 The following chemicals in high grade were obtained commercially or as a gift: 3-(4,5-  
103 dimethylthiazol-2-yl)-2,5-diphenyltetrazoliumbromide (MTT) (Sigma-Aldrich, St Louis, MO,  
104 USA); Raloxifene (Cipla Ltd., Goa, India); Phosphorous, calcium, alkaline phosphatase, tartrate-  
105 resistant acid phosphatase, total cholesterol, and triglyceride kits (Span Diagnostic Pvt. Ltd.);  
106 Dimethyl sulfoxide (DMSO) and phosphate buffer saline (PBS) (Mediatech Inc., Manassas, VA,  
107 USA); Xylazine (Indian Immunologicals Ltd., Hyderabad, India); Ketamine (Neon Laboratories  
108 Limited, Thane, India); Diclofenac (Troikaa Pharmaceuticals Ltd., Ahmedabad, India);  
109 Gentamicin (Abbott, Pitampur, India); DPPH (1,1-diphenyl-2-picrylhydrazyl) (HIMEDIA Co.  
110 Ltd., India) were procured.

### 111 **Extraction of plant material and fractionation**

112 Tubers of *P. tuberosa* were collected from Bilaspur, Chhattisgarh, India, with the help of the  
113 traditional practitioners and authenticated through the ICAR-National Bureau of Plant Genetic

114 Resources, Regional Station, Phagli, Shimla, India. A voucher specimen has been preserved in  
115 the Institute of Pharmacy, GGU, Bilaspur for future references. The fresh tubers were cut into  
116 small pieces and dried under shade, then coarsely powdered and stored in an air-tight container  
117 until further use. The coarse powder material was extracted with ethanol using soxhlet apparatus.  
118 The extract was concentrated under reduced pressure using a rotary vacuum evaporator. The  
119 concentrated extract was suspended in distilled water and successively fractionated by liquid-  
120 liquid partitioning with n-hexane, ethyl acetate and n-butanol. Finally, the remaining aqueous  
121 fraction was also prepared. All the fractions were dried and stored in air tight container until  
122 further use.

### 123 **Identification of antioxidant enriched fraction**

124 The mother extract (ethanol extract, PT), n-hexane fraction (PT1), ethyl acetate fraction  
125 (PT2), n-butanol fraction (PT3) and aqueous fraction (PT4) were evaluated for the antioxidant  
126 potential (by DPPH assay, ABTS assay and finding total antioxidant capacity) and phenolic  
127 composition (by total phenolic and flavonoid content determination) to identify the best  
128 antioxidant enriched fraction (AEF).

### 129 ***DPPH assay***

130 Scavenging of 1,1-diphenyl-2-picrylhydrazyl (DPPH) free radical of all the samples was  
131 measured spectrophotometrically [23]. Two milliliters of the samples of different concentrations  
132 were added to one milliliter of DPPH solution (methanolic, 0.2 mM). Methanol was used as a  
133 control in place of the samples. The solutions were kept at room temperature for one hour in the  
134 dark, and then the absorbance was measured at 517 nm. The potential of free radical scavenging  
135 was represented as the percentage inhibition of DPPH radical, and was calculated using the  
136 following formula. The concentration producing 50% inhibition ( $IC_{50}$ ) was also established.

137 
$$\% \text{ Inhibition} = \frac{(C - S)}{C} \times 100$$

138 Where, C = absorbance of the control and S = absorbance of the sample

139 ***ABTS assay***

140 Antioxidant capacity of the samples was analyzed based on their ability to interact with ABTS  
141 radicals [24]. The assay was performed following the protocol provided with the assay kit from  
142 Sigma-Aldrich, MO, USA (Catalog Number MAK187). The kit components were Cu<sup>+2</sup> reagent  
143 (Catalog Number MAK187A), assay diluent (Catalog Number MAK187B), protein mask  
144 (Catalog Number MAK187C) and Trolox standard, 1.0 μmole (Catalog Number MAK187D).  
145 Briefly, 10 μL of the sample, 90 μL of HPLC water and 100 μL of Cu<sup>+2</sup> working solution were  
146 transferred to each well in a 96 well plate. The contents were mixed thoroughly using a  
147 horizontal shaker and incubated in light protected condition at room temperature for 90 min.  
148 Finally, the absorbance was measured at 570 nm, and the Trolox equivalent as μM/g of the  
149 sample was determined from the standard curve of Trolox.

150 ***Determination of total antioxidant capacity (TAC)***

151 TAC, in terms of copper reducing equivalent (CRE) of the sample, was evaluated using  
152 OxiSelect™ TAC Assay Kit (Cell Biolabs, Inc., San Diego, CA, USA; Catalog Number: STA-  
153 360) [25]. The components of the kit were uric acid standard (Part No. 236001), reaction buffer,  
154 100X (Part No. 236002), copper ion reagent 100X (Part No. 236003) and stop solution, 10X  
155 (Part No. 236004). The assay protocol was as per the manufacturer's product manual. Briefly, 20  
156 μL of sample in various concentrations and 180 μL of 1X reaction buffer were transferred to  
157 each well in a 96 well plate and mixed thoroughly. An initial absorbance was taken at 490 nm.  
158 The reaction was started by adding 50 μL of 1X copper ion reagent into each well, and incubated

159 on an orbital shaker for 5 min. Then the reaction was stopped by adding 50  $\mu$ L of 1X stop  
160 solution to each well and absorbance was measured again. The net absorbance was calculated by  
161 subtracting the initial reading from the final reading and the mM uric acid equivalent (UAE) was  
162 determined from the uric acid standard curve. Finally the CRE was determined by multiplying  
163 UAE by 2189.

#### 164 ***Determination of total phenolic and flavonoid content***

165 Folin-Ciocalteu method and aluminum chloride colorimetric method were adopted for  
166 determining total phenolic content (TPC) and total flavonoid content (TFC), respectively [26] by  
167 reconstituting the samples in methanol. For determination of TPC, 100  $\mu$ L of the sample (1.0  
168 mg/mL) was mixed with 125  $\mu$ L of Folin-Ciocalteu reagent and 750  $\mu$ L of sodium carbonate  
169 solution (15% w/v) in a test tube. The final volume was adjusted to 5 mL with deionized water  
170 and mixed properly. The mixture was incubated at room temperature in the dark for 90 min, and  
171 then the absorbance was measured at 760 nm using a spectrophotometer. A blank sample with  
172 water and reagents was prepared and used as reference. TPC of the samples was represented as  
173 milligrams of gallic acid equivalents per gram dry weight (mg of GAE/g DW) of a sample  
174 through the calibration curve of gallic acid. For TFC estimation, 0.5 mL of sample (0.1 mg/mL)  
175 was mixed with 0.1 mL of  $AlCl_3$  (10%), 0.1 mL of potassium acetate (1 molar) and 1.5 mL of  
176 methanol (95%). The final volume was adjusted to 5 mL with distilled water and mixed  
177 thoroughly. The mixture was incubated in dark at room temperature for 60 min and then  
178 absorbance was measured at 415 nm. TFC was expressed as mg of rutin equivalents per gram  
179 (mg RE/g) of the sample through a standard curve of rutin. All measurements were carried out in  
180 triplicate.

#### 181 **GCMS analysis of the AEF**



182 Ethyl acetate fraction was identified as the antioxidant enriched fraction (AEF). GC/MS analysis  
183 was carried out on a GC/MS system comprising of Thermo Tracer 1300 GC and Thermo TSQ  
184 8000 MS. The GC was connected to a MS with the following conditions such as TG 5MS (30m  
185 X 0.25 mm X 0.25  $\mu$ m) column, operating in electron impact [electron ionization positive (EI+)]  
186 mode at 70 eV, helium (99.999%) as carrier gas at a constant flow of 1 ml/min, S/SL injector, an  
187 injection volume of 1.0  $\mu$ l (split ratio of 10:1), injection temperature 250°C and MS transfer line  
188 temperature 280°C. The oven temperature was programmed from 60°C (isothermal for 2 min),  
189 with a gradual increase in steps of 10°C/min to 280°C. Mass spectra were taken at 70 eV, a  
190 scanning interval of 0.5 sec, and a full mass scan range from 50 m/z to 700 m/z. Data acquisition  
191 was carried out by Xcalibur 2.2 SP1 data acquisition software. Interpretation of the mass  
192 spectrum of GC/MS was performed by the NIST (National Institute Standard and Technology)  
193 mass spectral search program for the NIST/EPA/NIH mass spectral library version 2.0 g. NIST  
194 11. The mass spectrum was compared with the spectrum of the components stored in the NIST  
195 library. The chemical name, molecular formula and molecular weight of the compounds were  
196 determined.

### 197 **Antiosteoporotic activity**

#### 198 *Animals*

199 Virgin female Wistar rats weighing 220-250 g were housed in polypropylene cages (two per  
200 cage) in air-conditioned room at 23 $\pm$ 1 °C, relative humidity of 50-60% and 12 h/12 h light/dark  
201 illumination cycle. The animals were provided free access to diet and water. The experiment was  
202 performed after approval (Reference No.: 119/IAEC/Pharmacy/2015) by Institutional Animal  
203 Ethical Committee (IAEC) of Institute of Pharmacy, Guru Ghasidas University, Bilaspur,  
204 Chhattisgarh (Reg. No.: 994/GO/Ere/S/06/CPCSEA) under the guidelines of CPCSEA.

205 ***Acute oral toxicity study***

206 An OECD 423 guideline was employed to determine the acute oral toxicity of AEF. The limit  
207 test was performed as per the guidelines on female rats (three rats per step) at a dose of 2000  
208 mg/kg, orally and monitored for 14 days. The AEF was suspended in carboxy methyl cellulose  
209 (1.0%). Neither mortality nor any signs of moribund status were found at this dose (2000 mg/kg).  
210 Therefore, the LD<sub>50</sub> cut-off is 5000 mg/kg (category 5 in the Globally Harmonized Classification  
211 System). The dosages selected for the antiosteoporotic property were 100 and 200 mg/kg/day.

212 ***Experimental protocol***

213 The animals were acclimatized for seven days. On the seventh day, rats were ovariectomized and  
214 sham operated after anaesthetization with ketamine and xylazine intraperitoneally. The ovaries  
215 were bilaterally removed by a small midline skin incision and in the case of sham-operated  
216 group, the ovaries were exposed and sutured back without removing them [27]. Postoperative  
217 care was taken by administering diclofenac and gentamicin with individual housing of the  
218 animals for a few days. After four weeks, the animals were divided into different groups  
219 containing six animals each and treatment was continued for 90 days as below:

220 Group I: Sham-operated and received 1% CMC (Sham control).

221 Group II: Ovariectomized animals and received 1% CMC (OVX control).

222 Group III: Ovariectomized animals treated with standard drug, Raloxifene (1 mg/kg) (RAL).

223 Group IV: Ovariectomized animals treated with AEF (100 mg/kg) (AEF-100).

224 Group V: Ovariectomized animals treated with AEF (200 mg/kg) (AEF-200).

225 At the end of drug treatment, food was withheld for 24 h, and then the urine sample was  
226 collected in metabolic cages. Urine samples were refrigerated until further investigation.

227 Animals were sacrificed by ether anesthesia, and blood was withdrawn from the abdominal  
228 aorta. The blood samples were centrifuged at 2500 rpm for 25 min and stored for biochemical  
229 examination. Uterus was taken out watchfully after blood withdrawal and weighed. The femur  
230 and fourth lumbar vertebrae were collected by detaching the connecting tissue and stored at -70  
231 °C until the biomechanical parameters were determined.

### 232 ***Determination of biochemical parameters***

233 Various serum parameters were determined by using diagnostic kits. The parameters include  
234 calcium, phosphorus, alkaline phosphatase (ALP), tartrate resistant acid phosphatase (TRAP),  
235 triglycerides (TG), and total cholesterol (TC). Hydroxyproline (HP), calcium, and phosphorus in  
236 urine were also determined as reported earlier [4, 11].

### 237 ***Determination of biomechanical parameters***

238 Weight (by digital balance), length (between the proximal tip of femur head and the distal tip of  
239 medial condyle) and thickness (using Vernier caliper) of femurs were measured after drying  
240 overnight and removal of bone marrow. Bone volume (by plethysmometer) and bone density  
241 (mass/volume) were also determined. The breaking strength of femur and fourth lumbar  
242 vertebrae was evaluated using hardness tester [11, 28].

### 243 ***Determination of body weight and organ weight***

244 Bodyweight of each animal was measured on the first day and the last day of treatment. Uterus  
245 weight was also measured immediately after its removal and detachment of uterine horns, fat and  
246 connective tissues [11, 29].

### 247 ***Histopathology of femur***

248 The right femur was fixed in 10% formalin for 12 h at 4°C, decalcified in ethylenediamine  
249 tetraacetic acid (EDTA) for 7 days, dehydrated, defatted, embedded in paraffin wax and section  
250 in the sagittal plane of 5 µm thickness was taken using a microtome. The sections were stained  
251 with hematoxylin and eosin (H & E), and scrutinized for histopathological changes under a light  
252 microscope (Primo Star, Zeiss with AxioCam ERc 5s camera) [7].

### 253 ***In vitro* cytotoxicity of antioxidant enriched fraction (AEF)**

254 Breast (MCF-7 and MDA-MB-231) and ovarian (SKOV-3) cancer cells in DMEM media  
255 [supplemented with 10% fetal bovine serum (Mediatech, Manassas, VA) and 1%  
256 penicillin/streptomycin (Penicillin Streptomycin Solution 100X with 10,000 IU/mL penicillin  
257 and 10,000 µg/mL streptomycin, Mediatech, Manassas, VA)] were transferred to 96-well tissue  
258 culture plates at a density of 3000 cells/well, 24 h before treatment. The medium was then  
259 replaced with fresh medium containing AEF at various concentrations (31.5 to 500 µg/mL). The  
260 culture medium without any drug formulation was used as the control. After 72 h of incubation  
261 at 37°C and 5% CO<sub>2</sub>, media was removed carefully after taking out the culture plate from the  
262 incubator, and cells were washed twice with sterile PBS. 50 µl of MTT solution (0.5 mg/ml in  
263 DMEM media) was put into each well and further incubated for 4.0 h in the same condition. The  
264 medium was then removed from each well, and 100 µl of DMSO was added to each well to  
265 dissolve the purple formazan crystal obtained from the MTT assay. The absorbance value of  
266 each well was measured at 570 nm using a micro plate reader (Varioskan Flash, Thermo  
267 Scientific, USA). The percent cell viability with different treatments was calculated from the  
268 following formula [7, 30].

$$269 \quad \% \text{ Cell Viability} = \frac{\text{Absorbance of Test}}{\text{Absorbance of Control}} \times 100$$

## 270 **Docking study of the identified phytoconstituents in AEF**

271 In our earlier study, we have reported the presence of genistein and daidzein in the antioxidant  
272 enriched fraction (the ethyl acetate fraction) [31]. Docking study of these two compounds with  
273 estrogen receptor  $\alpha$  (1x76) and estrogen receptor  $\beta$  (1x7R) [ER- $\alpha$  and ER- $\beta$ ] was performed to  
274 elucidate the mode of interaction. All computational studies were carried out using FlexX  
275 LeadIT 2.1.8 of BiosolveIT in a Machine running on a 2.4 GHz Intel Core i5-2430M processor  
276 with 4GB RAM and 500 GB Hard Disk with Windows 10 as the Operating System. The 3D  
277 conformer of the ligands was downloaded from PubChem in .sdf format. Reference protein  
278 coordinates of ER- $\alpha$  and ER- $\beta$  for docking studies was obtained from X-ray structures deposited  
279 in Protein Data Bank (<http://www.rcsb.org>). For protein preparation, the chain having the  
280 receptor was selected as receptor components. Then reference ligand was selected. All the  
281 chemical ambiguities, which were crystallographically unresolved structures, were resolved, and  
282 the receptor was confirmed. The docking process deals with the translational, torsional, and ring  
283 conformation degrees of freedom. It was done by “Define Flex Docking” utility, and the FlexX  
284 accurately predicted the geometry of the protein-ligand complex within a few seconds. Then the  
285 docking was done using default parameters using a hybrid approach, followed by visualization  
286 using Pose View. The best conformation for each ligand sorted by the final binding affinity was  
287 stored [32].

## 288 **Statistical analysis**

289 Data were represented as mean  $\pm$  standard error means (SEMs). The data obtained in  
290 antiosteoporotic activity were subjected to a one-way analysis of variance (ANOVA) followed  
291 by post hoc Newman-Keuls multiple comparisons for significance using GraphPad Prism 7.0

292 (GraphPad Software, La Jolla, CA, USA) software. A value of  $p < 0.05$  was considered as  
293 statistically significant.

## 294 Results

### 295 Characterization of antioxidant enriched fraction

296 The antioxidant potential of different samples (ethanol extract, and n-hexane, ethyl acetate, n-  
297 butanol and aqueous fractions) was evaluated based on their phenolic composition (total phenolic  
298 and flavonoid content as gallic acid equivalent and rutin equivalent, respectively), and  
299 antioxidant potential (by DPPH method, ABTS assay and determining total antioxidant  
300 capacity). Ethyl acetate fraction was regarded as the AEF for further study as it contained  
301 maximum phenolics and antioxidant activity ([Tables 1 and 2](#)).

302 **Table 1.** Total phenolic and flavonoid content, and antioxidant potential of ethanol extract and  
303 different fractions of *P. tuberosa*.

| Sample | TPC<br>(mg GAE/g DW) | TFC<br>(mg RE/g DW) | IC <sub>50</sub><br>(DPPH method)<br>( $\mu\text{g/mL}$ ) | $\mu\text{M}$ Trolox equivalent/g<br>sample (ABTS assay) |
|--------|----------------------|---------------------|-----------------------------------------------------------|----------------------------------------------------------|
| PT     | 12.0 $\pm$ 0.70      | 40.26 $\pm$ 0.83    | 597.5 $\pm$ 7.89                                          | 376.13 $\pm$ 8.72                                        |
| PT1    | 0.95 $\pm$ 0.07      | 2.19 $\pm$ 0.35     | 1396.72 $\pm$ 15.85                                       | 45.87 $\pm$ 3.79                                         |
| PT2    | 106.23 $\pm$ 1.66    | 261.9 $\pm$ 1.73    | 55.70 $\pm$ 3.15                                          | 907.51 $\pm$ 8.07                                        |
| PT3    | 56.0 $\pm$ 1.30      | 25.56 $\pm$ 0.65    | 110.27 $\pm$ 10.41                                        | 360.26 $\pm$ 8.35                                        |
| PT4    | 26.46 $\pm$ 1.66     | 12.67 $\pm$ 0.77    | 291.08 $\pm$ 6.33                                         | 92.10 $\pm$ 4.84                                         |

304 Values are mean  $\pm$  SEMs (n=3). PT, ethanol extract of *P. tuberosa*; PT1, n-hexane fraction; PT2,  
305 ethyl acetate fraction; PT3, n-butanol fraction; PT4, aqueous fraction; TPC, total phenolic  
306 content; TFC, total flavonoid content; GAE, gallic acid equivalent; DW, dry weight; RE, rutin  
307 equivalent; IC<sub>50</sub>, the concentration that provides a reduction of 50%; DPPH, 1,1-diphenyl-2-  
308 picrylhydrazyl; ABTS, 2,2'-azino-bis(3-ethylbenzothiazoline-6-sulfonic acid).

309 **Table 2.** Copper reducing equivalent of ethanol extract and different fractions of *P. tuberosa* at  
310 different concentrations.

| Concentration<br>( $\mu\text{g/mL}$ ) | Copper reducing equivalent |                  |                   |                  |                  |
|---------------------------------------|----------------------------|------------------|-------------------|------------------|------------------|
|                                       | PT                         | PT1              | PT2               | PT3              | PT4              |
| 12.5                                  | 4.38 $\pm$ 0.10            | 2.19 $\pm$ 0.04  | 6.57 $\pm$ 0.30   | 6.79 $\pm$ 0.62  | 5.47 $\pm$ 0.08  |
| 25                                    | 5.47 $\pm$ 0.18            | 4.38 $\pm$ 0.07  | 21.89 $\pm$ 0.62  | 9.41 $\pm$ 0.30  | 5.91 $\pm$ 0.04  |
| 50                                    | 6.57 $\pm$ 0.22            | 5.47 $\pm$ 0.11  | 35.02 $\pm$ 0.48  | 9.85 $\pm$ 0.28  | 6.57 $\pm$ 0.12  |
| 100                                   | 8.76 $\pm$ 0.12            | 9.85 $\pm$ 0.22  | 72.24 $\pm$ 2.12  | 10.07 $\pm$ 0.80 | 9.85 $\pm$ 0.34  |
| 200                                   | 10.95 $\pm$ 0.28           | 15.32 $\pm$ 0.56 | 113.83 $\pm$ 1.62 | 26.27 $\pm$ 0.74 | 13.13 $\pm$ 0.82 |

311 Values are mean  $\pm$  SEMs (n=3); PT, ethanol extract; PT1, n-hexane fraction; PT2, ethyl acetate  
312 fraction; PT3, n-butanol fraction; PT4, aqueous fraction.

### 313 GC/MS analysis of AEF

314 AEF from *P. tuberosa* contained 23 different chemical moieties ([S1 as supplementary material](#))  
315 including stigmasterol,  $\beta$ -sitosterol and stigmasta-3,5-dien-7-one.

### 316 Antiosteoporotic activity

317 The antiosteoporotic potential of AEF of *P. tuberosa* was evaluated in ovariectomized-induced  
318 osteoporosis in female rats by determining the following parameters:

#### 319 *Effect of AEF on biochemical parameters*

320 Phosphorous (P) and calcium (Ca) level were analyzed both in serum and urine ([Fig 1 and 2](#)).  
321 OVX, as well as all other treatments did not significantly alter serum P and Ca. The level of P  
322 and Ca in urine increased significantly in the OVX group over sham control. Administration with  
323 both doses of AEF and raloxifene significant reduced the OVX-induced increase in urine P and  
324 Ca. Levels of bone markers, ALP and TRAP were significantly enhanced ( $p < 0.001$ ) after OVX.

325 Both ALP and TRAP levels were reduced significantly and dose dependent after AEF treatment  
326 (versus OVX). Serum ALP and TRAP level were also reduced significantly after raloxifene  
327 treatment (Fig 1). OVX caused significant increase in the level of urine hydroxyproline (HP)  
328 compared to sham control. However the level of HP in raloxifene and AEF (100 and 200 mg/kg)  
329 treated groups was distinctly lowered ( $p < 0.001$ ) compared to the OVX group (Fig 2). Level of  
330 TC and TG increased significantly ( $p < 0.001$ ) in the OVX group compared to the sham control  
331 group (Fig 1). These increased TC and TG level was markedly lowered by AEF and raloxifene  
332 treatment. TG levels in raloxifene and AEF-200 groups are comparable with the sham control,  
333 and AEF exhibited better effect over raloxifene.

334

335 **Fig 1.** Effect of AEF from *P. tuberosa* on biochemical parameters of serum. Data were average  $\pm$   
336 SEM (n=6). \*\*\*  $p < 0.001$  significantly different from sham control group. ##  $p < 0.01$ , ###  $p <$   
337  $0.001$  significantly different from OVX group. Ca, calcium; P, phosphorus; ALP, alkaline  
338 phosphatase; TRAP, tartrate resistant acid phosphatase; TG, triglycerides; TC, total cholesterol.

339

340 **Fig 2.** Effect of AEF from *P. tuberosa* on biochemical parameters of urine. Data were average  $\pm$   
341 SEM (n=6). \*\*\*  $p < 0.01$  significantly different from sham control group. #  $p < 0.05$ , ##  $p <$   
342  $0.01$ , ###  $p < 0.001$  significantly different from OVX group. Ca, calcium; P, phosphorus; HP,  
343 hydroxyproline.

344

#### 345 ***Effect of AEF on biomechanical parameters***

346 None of the groups showed any significant alteration of femur length. Femur thickness, volume,  
347 weight and breaking strength were significantly decreased ( $p < 0.001$ ) in the OVX control



348 compared to the sham control group. Significant increase in all these parameters (Fig 3 and 4)  
349 was observed with AEF and raloxifene administration. Furthermore, OVX caused a significant  
350 reduction of femur density, and treatment with AEF showed a substantial improvement of femur  
351 density. Treatment with raloxifene and AEF restored the breaking strength of 4<sup>th</sup> lumbar  
352 vertebrae caused by ovariectomy (Fig 4).

353

354 **Fig 3.** Effect of AEF from *P. tuberosa* on femur biomechanical parameters. Data were average  $\pm$   
355 SEM (n=6). \*\* p < 0.01, \*\*\* p < 0.001 significantly different from sham control group. # p <  
356 0.05, ## p < 0.01, ### p < 0.001 significantly different from OVX group.

357

358 **Fig 4.** Effect of AEF from *P. tuberosa* on breaking strength of femur and 4<sup>th</sup> lumbar vertebrae.  
359 Data were average  $\pm$  SEM (n=6). \*\*\* p < 0.001 significantly different from sham control group.  
360 ## p < 0.01, ### p < 0.001 significantly different from OVX group.

361

### 362 ***Effect of AEF on body and organ weight***

363 A significant (p<0.001) increase in body weight (BW) was observed due to OVX though there  
364 was no variation at the start of the study. Treatment with AEF and raloxifene markedly reduced  
365 the increased BW (Fig 5) as well as the final and initial BW difference compared to OVX. OVX  
366 caused a marked reduction in uterus weight. In comparison, administration of raloxifene, and  
367 AEF significantly increased uterine weight compared to OVX (Fig 5).

368

369 **Fig 5.** Effect of AEF from *P. tuberosa* on body and uterus weight. Data were average  $\pm$  SEM  
370 (n=6). \*\*\* p < 0.001 significantly different from Sham control group. ## p < 0.01, ### p <  
371 0.001 significantly different from OVX group.

372

### 373 ***Histopathology study***

374 Photographs of the femur of different groups of animals are depicted in [Fig 6A-E](#). There was a  
375 distraction of trabeculae with the decline in thickness and development of large cyst like spaces  
376 following OVX. Treatment with raloxifene and AEF showed trabecular ossification,  
377 mineralization, and compactness. Photomicrographs of raloxifene and AEF treated groups are  
378 indicative of the antiosteoporotic activity.

379

380 **Fig 6.** Effect of AEF of *P. tuberosa* on histopathology of the femur. **A**, Photomicrography of the  
381 femur of sham control group showing typical bone architecture; **B**, Photomicrography of the  
382 femur of OVX control group showing disruption of trabeculae; **C**, Photomicrography of the  
383 femur of raloxifene treated group showing improved trabecular thickness, and compactness of  
384 cells indicating mineralization of bone; **D**, Photomicrography of the femur of AEF-100 mg/kg  
385 treated group showing the improved trabecular thickness and bone architecture; **E**,  
386 Photomicrography of the femur of AEF-200 mg/kg treated group showing the restoration of  
387 typical bone architecture and increase in width of trabeculae.

388

### 389 ***In vitro* cytotoxicity of AEF**

390 Postmenopausal osteoporosis, which typically causes weakness of bone as the process of bone-  
391 resorption exceeds bone-formation because of estrogen-deficient state [33]. Hormone  
392 replacement therapy (HRT) is a choice to manage the problems in postmenopausal women, but  
393 continuous administration of HRT has the danger of cancer (breast, ovary and endometrial)  
394 development [34]. Therefore, we assessed the *in vitro* anticancer activity of AEF (31.5 - 500  
395  $\mu\text{g}/\text{mL}$ ) in MCF-7 and MDA-MB-231 breast and SKOV-3 ovarian cancer cell lines. AEF  
396 displayed anticancer activity against the three cancer cell lines in a dose dependent manner (Fig  
397 7) confirming that AEF is safe and can take care of the menopausal complications. AEF  
398 demonstrated better activity against ovarian cancer cells compared to breast cancer cells.

399

400 **Fig 7.** *In vitro* cytotoxicity of AEF of *P. tuberosa* against different cancer cell lines. Values are  
401 mean  $\pm$  SEMs (n=3).

402

### 403 **Docking study**

404 High performance thin layer chromatography analysis confirmed the presence of daidzein and  
405 genistein in AEF of *P. tuberosa* [31]. Docking pose of these phytoconstituents into estrogen  
406 receptor (ER)  $\alpha$  (1 X 76) and  $\beta$  (1 X 7R) were evaluated and furnished in Fig 8 and 9. Genistein  
407 exhibited -26.1648 and -32.4084 docking score into ER-  $\alpha$  and  $\beta$  active site, respectively. The  
408 docking score of daidzein into ER-  $\alpha$  and  $\beta$  active site was -28.3129 and -31.8923, respectively.

409

410 **Fig 8.** Docking study of genistein in estrogen receptors. **A**, Co-crystallized ligand of 1x76  
411 (genistein) showing hydrogen bond with Arg346, Leu339, and His475. Hydrophobic interactions

412 were also seen near the benzene rings with different amino acid residues of estrogen receptor  $\alpha$   
413 (PDB: 1x76). The ligand showed a docking score of -26.1648. **B**, Co-crystalized ligand of 1x7R  
414 (genistein) showing hydrogen bond with Leu346, Arg394, Gly521, Glu353 and His524.  
415 Hydrophobic interactions were also seen near the benzene rings with different amino acid  
416 residues of estrogen receptor  $\beta$  (PDB: 1x7R). The ligand showed a docking score of -32.4084.

417  
418 **Fig 9.** Docking study of daidzein in estrogen receptors. **A**, Docking pose of daidzein in estrogen  
419 receptor  $\alpha$  (PDB: 1x76) active site with a docking score of -28.3129. Daidzein formed hydrogen  
420 bond with Arg346, Glu305, and His475. Hydrophobic interactions were also seen near the  
421 benzene rings with different amino acid residues of estrogen receptor  $\alpha$  (PDB: 1x76). **B**, Docking  
422 pose of daidzein in estrogen receptor  $\beta$  (1 x 7R) active site with a docking score of -31.8923.  
423 Daidzein showed hydrogen bond with Arg394, Glu353, Gly521 and His524. Hydrophobic  
424 interactions were also seen near the benzene rings with different amino acid residues of estrogen  
425 receptor  $\beta$  (PDB: 1x7R).

426

## 427 **Discussion**

428 Antioxidants play a major role in controlling the menopausal complications, including  
429 osteoporosis [7]. In this study, we have explored the *in vivo* anti-osteoporotic and *in vitro*  
430 anticancer activities of an AEF from the tubers of *P. tuberosa*. Ethanol extract of tubers of *P.*  
431 *tuberosa* and its various fractions (hexane, ethyl acetate, n-butanol, and aqueous) were analyzed  
432 for total phenolic and flavonoid content, and antioxidant activity. It was found that the ethyl  
433 acetate fraction contained maximum phenolic and flavonoid content, and antioxidant property,  
434 and was recognized the AEF.

435           The anti-osteoporotic activity of the AEF was evaluated in ovariectomized (OVX) rats by  
436 determining biochemical and biomechanical parameters, body and organ weights, and  
437 histopathology. The pattern of change in bone mineral parameters such as P and Ca in the  
438 present study confirms earlier findings of minor bone mineralization and balanced mineral  
439 homeostasis. The AEF did not change homeostasis and the effect might be because of enhanced  
440 absorption of calcium in intestine, as reported in previous studies [4, 7]. ALP and TRAP (bone  
441 turnover markers) activity are signs of bone osteoblast functioning and factors of bone formation.  
442 OVX increased these markers in serum because of the reduction in the estrogen level. HP is a  
443 commonly accepted biochemical parameter associated with bone metabolism, and its level is a  
444 sign of osteogenic activity. Urinary HP indicates break down of collagen due to high level of  
445 TRAP formed from activated osteoclast [35]. In the present study, the increased level of HP,  
446 TRAP, and ALP in OVX confirms reduced bone formation and an augmentation of collagen  
447 degradation. Further, administration of raloxifene and AEF reduced the above parameters, which  
448 indicates bone resorption inhibition property. AEF treatment produced positive effects on OVX-  
449 induced hyperlipidemia which could be due to existence of daidzein, genistein and  $\beta$ -sitosterol in  
450 *P. tuberosa*. Flavonoids could scavenge reactive oxygen species, which block TG secretion into  
451 the plasma and upset cholesterol catabolism into bile acids. Daidzein and genistein have been  
452 scientifically screened as antihyperlipidemic agents [36]. Further, presence of  $\beta$ -sitosterol in AEF  
453 hinders absorption of cholesterol by controlling lipogenesis and lipolysis [37].

454           Ovariectomized animal model, the most commonly used screening method of  
455 antiosteoporotic agents, has shown bone mineral density reduction leading to bone loss and  
456 increased susceptibility of fracture [38]. Healthy bones are normally compact and can tolerate  
457 considerable load. The compactness of the bone could be assessed by determining the bone

458 strength. In the current study, the breaking strength of femur and 4<sup>th</sup> lumbar vertebrae increased  
459 substantially by AEF of *P. tuberosa* proving the defensive effect of AEF against menopausal  
460 osteoporosis which are comparable to earlier reports [4, 7]. The phytoestrogens of AEF might  
461 have an estrogen like activity that manages osteoclast activity and reduces bone turnover.

462 The reduction of estrogen level in OVX animals causes increase in energy intake and  
463 elevated body weight [39]. Further, decrease in estrogen level due to OVX led to deposition of  
464 fat (as shown in the rise of total cholesterol and triglyceride) and hence an increase in body  
465 weight [11]. The observations in this study confirm that AEF administration reduced the level of  
466 cholesterol and TG in serum, which signifies the protective role of AEF against OVX-induced  
467 body weight gain. These observations corroborate the protective effect of AEF on adipose tissue  
468 and protection against the growth of osteoporosis [40].

469 Bone weakness is associated with bone mass, as well as its structure. Hence,  
470 histopathological analysis is a significant parameter to analyze the bone strength. OVX is  
471 associated with an increase in bone turnover, reduction in bone balance and loss in bone mineral  
472 density in the trabecular region of the femur [41]. The observed osteoprotective property of AEF  
473 manifested by superior trabecular architecture may be attributed to the secondary metabolites of  
474 AEF, which probably act as phytoestrogens to minimize bone loss [42].

475 In our earlier study, we reported the presence of two isoflavones, genistein and daidzein  
476 in the AEF [31]. In the present study, the phytoestrogenic nature of these two isoflavones was  
477 established by docking studies with estrogen receptor  $\alpha$  and  $\beta$ , where both the compounds were  
478 found to have good affinity with both the receptors. As per earlier literature, estradiol has  
479 docking score of -18 and -17 into estrogen receptor  $\alpha$  and  $\beta$  active site, respectively [40]. Our  
480 findings showed that bioactive compounds present in *P. tuberosa* have higher affinity compared

481 to estradiol, which is also supported by earlier studies as daidzein and genistein showed high  
482 affinity into estrogen receptors [43]. Therefore, these two compounds might be mainly  
483 responsible for the antiosteoporotic property, which has been reported earlier [44, 45].

484 Phytoestrogens have been used as an alternative therapy for the management of  
485 menopausal osteoporosis as the regular use of hormone replacement therapy causes severe side  
486 effects, including cancer of breast and ovary [34]. Phytoestrogenic compounds also induce cell  
487 proliferation in ER-positive human breast cancer cells (MCF-7) [46]. However, in this study,  
488 AEF exhibited *in vitro* anticancer property in breast and ovarian cancer cell lines, suggesting its  
489 safety in the treatment of postmenopausal osteoporosis.

## 490 **Conclusion**

491 The AEF from *P. tuberosa* contains bioactive compounds like genistein, daidzein,  $\beta$ -sitosterol,  
492 stigmasterol, etc. AEF exhibited marked antiosteoporotic activity in ovariectomy-induced  
493 osteoporosis. The protective effect of AEF might be attributed to its antioxidant potential as bone  
494 loss in osteoporosis could be due to generation of reactive oxygen species/oxidative stress along  
495 with other factors. Also, the presence of phytoestrogenic compounds such as daidzein and  
496 genistein in the AEF and their direct interaction with estrogen receptors may add to the  
497 protective effect. The AEF also exhibited significant anticancer activity in breast and ovarian  
498 cancer cell lines. The findings elucidated that AEF could be used as a safe therapeutics for  
499 controlling menopausal problems. However, further research is necessary for isolation of  
500 bioactive molecules from AEF and mechanistic studies are required to probe their  
501 antiosteoporotic effect.

502

## 503 **Acknowledgements**

504 This work was supported by University Grants Commission, New Delhi, India [F.NO.5-  
505 63/2016(IC)]. The support of Dr. Pankaj Samuel, GC/MS Laboratory, Panjab University,  
506 Chandigarh, India, is highly appreciated for performing GC/MS analysis. We would like to  
507 express our sincere gratitude to Dr. Manik Ghosh, Department of Pharmaceutical Sciences and  
508 Technology, Birla Institute of Technology, Ranchi, India, for conducting docking studies.

## 509 **Supporting information**

510 Results of the GC/MS analysis of the antioxidant enriched fraction (Table 3) are available as  
511 supporting information.

512

## 513 **References**

- 514 1. WHO. Scientific Group on the Assessment of Osteoporosis at Primary Health Care  
515 Level. Summary Meeting Report. Geneva: World Health Organization. 2007 [Accessed  
516 March 2, 2020]. Available at [www.who.int/chp/topics/Osteoporosis.pdf](http://www.who.int/chp/topics/Osteoporosis.pdf).
- 517 2. Rachner TD, Khosla S, Hofbauer LC. Osteoporosis: now and the future. *Lancet* 2011;  
518 377(9773): 1276-1287. [https://doi.org/10.1016/S0140-6736\(10\)62349-5](https://doi.org/10.1016/S0140-6736(10)62349-5)
- 519 3. Bidwell JP, Alvarez MB, Hood M, Jr., Childress P. Functional impairment of bone  
520 formation in the pathogenesis of osteoporosis: the bone marrow regenerative competence.  
521 *Curr Osteoporos Rep.* 2013; 11(2): 117-125. <https://doi.org/10.1007/s11914-013-0139-2>
- 522 4. Desai S, Babaria P, Nakarani M, Shah K, Paranjape A. Antiosteoporotic effect of  
523 *Hemidesmus indicus* Linn. on ovariectomised rats. *J Ethnopharmacol.* 2017; 199: 1-8.  
524 <https://doi.org/10.1016/j.jep.2017.01.031>



- 525 5. Nadia ME, Nazrun AS, Norazlina M, Isa NM, Norliza M, Ima Nirwana S. The Anti-  
526 Inflammatory, Phytoestrogenic, and Antioxidative Role of *Labisia pumila* in Prevention  
527 of Postmenopausal Osteoporosis. *Adv Pharmacol Sci.* 2012; 2012: 706905.  
528 <https://doi.org/10.1155/2012/706905>
- 529 6. Kaplan JR, Manuck SB. Ovarian dysfunction, stress, and disease: a primate continuum.  
530 *ILAR J.* 2004; 45(2): 89-115. <https://doi.org/10.1093/ilar.45.2.89>
- 531 7. Satpathy S, Patra A, Hussain MD, Ahirwar B. Amelioration of postmenopausal  
532 osteoporosis and anticancer properties of an antioxidant enriched fraction from  
533 *Hygrophila spinosa* T. Anders. *S Afr J Bot.* 2018; 117: 247-255.  
534 <https://doi.org/10.1016/j.sajb.2018.05.033>
- 535 8. Manolagas SC. From estrogen-centric to aging and oxidative stress: a revised perspective  
536 of the pathogenesis of osteoporosis. *Endocr Rev.* 2010; 31(3): 266-300.  
537 <https://doi.org/10.1210/er.2009-0024>
- 538 9. Sánchez-Rodríguez MA, Ruiz-Ramos M, Correa-Muñoz E, Mendoza-Núñez VM.  
539 Oxidative stress as a risk factor for osteoporosis in elderly Mexicans as characterized by  
540 antioxidant enzymes. *BMC Musculoskelet Disord.* 2007; 8: 124.  
541 <https://doi.org/10.1186/1471-2474-8-124>
- 542 10. Nazrun AS, Norazlina M, Norliza M, Nirwana SI. The anti-inflammatory role of vitamin  
543 e in prevention of osteoporosis. *Adv Pharmacol Sci.* 2012; 2012: 142702.  
544 <https://doi.org/10.1155/2012/142702>
- 545 11. Satpathy S, Patra A, Ahirwar B. Experimental techniques for screening of  
546 antiosteoporotic activity in postmenopausal osteoporosis. *J Complement Integr Med.*  
547 2015; 12(4): 251-266. <https://doi.org/10.1515/jcim-2015-0034>

- 548 12. Gambacciani M, Levancini M. Hormone replacement therapy and the prevention of  
549 postmenopausal osteoporosis. *Menopause Rev.* 2014; 13(4): 213-220.  
550 <https://doi.org/10.5114/pm.2014.44996>
- 551 13. Kharazmi M, Hallberg P, Michaelsson K. Gender related difference in the risk of  
552 bisphosphonate associated atypical femoral fracture and osteonecrosis of the jaw. *Ann*  
553 *Rheum Dis.* 2014; 73(8): 1594. <https://doi.org/10.1136/annrheumdis-2013-205080>
- 554 14. Kraenzlin ME, Meier C. Parathyroid hormone analogues in the treatment of osteoporosis.  
555 *Nat Rev Endocrinol.* 2011; 7(11): 647-656. <https://doi.org/10.1038/nrendo.2011.108>
- 556 15. Sulaiman CT, Arun A, Anandan EM, Sandhya CR, Balachandran I. Isolation and  
557 identification of phytoestrogens and flavonoids in an Ayurvedic proprietary medicine  
558 using chromatographic and Mass Spectroscopic analysis. *Asian Pac J Reprod.* 2015; 4(2):  
559 153-156. [https://doi.org/10.1016/S2305-0500\(15\)30013-0](https://doi.org/10.1016/S2305-0500(15)30013-0)
- 560 16. Jia M, Nie Y, Cao DP, Xue YY, Wang JS, Zhao L, Rahman K, Zhang QY, Qin LP.  
561 Potential antiosteoporotic agents from plants: a comprehensive review. *Evid Based*  
562 *Complement Alternat Med.* 2012; 2012: 364604. <https://doi.org/10.1155/2012/364604>
- 563 17. Occhiuto F, Pasquale RD, Guglielmo G, Palumbo DR, Zangla G, Samperi S, Renzo A,  
564 Circosta C. Effects of phytoestrogenic isoflavones from red clover (*Trifolium pratense*  
565 *L.*) on experimental osteoporosis. *Phytother Res.* 2007; 21(2): 130-134.  
566 <https://doi.org/10.1002/ptr.2037>
- 567 18. Kolios L, Schumann J, Sehmisch S, Rack T, Tezval M, Seidlova-Wuttke D, Frosch KH,  
568 Stuermer KM, Stuermer EK. Effects of black cohosh (*Cimicifuga racemosa*) and  
569 estrogen on metaphyseal fracture healing in the early stage of osteoporosis in

- 570 ovariectomized rats. *Planta Med.* 2010; 76(9): 850-857. <https://doi.org/10.1055/s-0029->  
571 1240798
- 572 19. Urasopon N, Hamada Y, Cherdshewasart W, Malaivijitnond S. Preventive effects of  
573 *Pueraria mirifica* on bone loss in ovariectomized rats. *Maturitas* 2008; 59(2): 137-148.  
574 <https://doi.org/10.1016/j.maturitas.2008.01.001>
- 575 20. Suthon S, Jaroenporn S, Charoenphandhu N, Suntornsaratoon P, Malaivijitnond S. Anti-  
576 osteoporotic effects of *Pueraria candollei* var. *mirifica* on bone mineral density and  
577 histomorphometry in estrogen-deficient rats. *J Nat Med.* 2016; 70(2): 225-233.  
578 <https://doi.org/10.1007/s11418-016-0965-5>
- 579 21. Tanaka T, Tang H, Yu F, Michihara S, Uzawa Y, Zaima N, Moriyama T, Kawamura Y.  
580 Kudzu (*Pueraria lobata*) vine ethanol extracts improve ovariectomy-induced bone loss in  
581 female mice. *J Agric Food Chem.* 2011; 59(24): 13230-13237.  
582 <https://doi.org/10.1021/jf2031617>
- 583 22. Maji AK, Pandit S, Banerji P, Banerjee D. *Pueraria tuberosa*: a review on its  
584 phytochemical and therapeutic potential. *Nat Prod Res.* 2014; 28(23): 2111-2127.  
585 <https://doi.org/10.1080/14786419.2014.928291>
- 586 23. Patra A, Jha S, Sahu A. Antidiabetic activity of aqueous extract of *Eucalyptus citriodora*  
587 hook. in alloxan induced diabetic rats. *Pharmacogn Mag.* 2009; 5(19): 51-54
- 588 24. Spigno G, De Faveri DM. Microwave-assisted extraction of tea phenols: A  
589 phenomenological study. *J Food Eng.* 93(2): 210-217.  
590 <https://doi.org/10.1016/j.jfoodeng.2009.01.006>

- 591 25. Harisa GI, Attia SM, Zoheir KM, Alanazi FK. Chitosan treatment abrogates  
592 hypercholesterolemia-induced erythrocyte's arginase activation. Saudi Pharm J. 2017;  
593 25(1): 120-127. <https://doi.org/10.1016/j.jsps.2016.05.007>
- 594 26. Madaan R, Bansal G, Kumar S, Sharma A. Estimation of Total Phenols and Flavonoids  
595 in Extracts of *Actaea spicata* Roots and Antioxidant Activity Studies. Indian J Pharm Sci.  
596 2011; 73(6): 666-669. <https://doi.org/10.4103/0250-474X.100242>
- 597 27. Green CJ, Knight J, Precious S, Simpkin S. Ketamine alone and combined with diazepam  
598 or xylazine in laboratory animals: a 10 year experience. Lab Anim. 1981; 15(2): 163-170.  
599 <https://doi.org/10.1258/002367781780959107>
- 600 28. Shirwaikar A, Khan S, Malini S. Antiosteoporotic effect of ethanol extract of *Cissus*  
601 *quadrangularis* Linn. on ovariectomized rat. J Ethnopharmacol. 2003; 89(2-3): 245-250.  
602 <https://doi.org/10.1016/j.jep.2003.08.004>
- 603 29. Yogesh HS, Chandrashekhar VM, Katti HR, Ganapaty S, Raghavendra HL, Gowda GK,  
604 Goplakrishna B. Anti-osteoporotic activity of aqueous-methanol extract of *Berberis*  
605 *aristata* in ovariectomized rats. J Ethnopharmacol. 2011; 134(2): 334-338.  
606 <https://doi.org/10.1016/j.jep.2010.12.013>
- 607 30. Patra A, Satpathy S, Shenoy AK, Bush JA, Kazi M, Hussain MD. Formulation and  
608 evaluation of mixed polymeric micelles of quercetin for treatment of breast, ovarian, and  
609 multidrug resistant cancers. Int J Nanomedicine 2018; 13: 2869-2881.  
610 <https://doi.org/10.2147/IJN.S153094>
- 611 31. Satpathy S, Patra A, Hussain MD, Ahirwar B. Simultaneous estimation of genistein and  
612 daidzein in *Pueraria tuberosa* (Willd.) DC by validated high-performance thin-layer

- 613 chromatography (HPTLC) densitometry method. *J Liq Chromatogr Relat Technol.* 2017;  
614 40(10): 499-505. <https://doi.org/10.1080/10826076.2017.1329743>
- 615 32. Keshri G, Oberoi RM, Lakshmi V, Pandey K, Singh MM. Contraceptive and hormonal  
616 properties of the stem bark of *Dysoxylum binectariferum* in rat and docking analysis of  
617 rohitukine, the alkaloid isolated from active chloroform soluble fraction. *Contraception*  
618 2007; 76(5): 400-407. <https://doi.org/10.1016/j.contraception.2007.07.009>
- 619 33. Hertrampf T, Gruca MJ, Seibel J, Laudénbach U, Fritzemeier KH, Diel P. The bone-  
620 protective effect of the phytoestrogen genistein is mediated via ER alpha-dependent  
621 mechanisms and strongly enhanced by physical activity. *Bone* 2007; 40(6): 1529-1535.  
622 <https://doi.org/10.1016/j.bone.2007.02.006>
- 623 34. Rossouw JE, Anderson GL, Prentice RL, LaCroix AZ, Kooperberg C, Stefanick ML,  
624 Jackson RD, Beresford SA, Howard BV, Johnson KC, Kotchen JM, Ockene J. Risks and  
625 benefits of estrogen plus progestin in healthy postmenopausal women: principal results  
626 From the Women's Health Initiative randomized controlled trial. *JAMA* 2002; 288(3):  
627 321-333. <https://doi.org/10.1001/jama.288.3.321>
- 628 35. Halleen JM, Alatalo SL, Suominen H, Cheng S, Janckila AJ, Vaananen HK. Tartrate-  
629 resistant acid phosphatase 5b: a novel serum marker of bone resorption. *J Bone Miner*  
630 *Res.* 2000; 15(7): 1337-1345. <https://doi.org/10.1359/jbmr.2000.15.7.1337>
- 631 36. Hirota K, Morikawa K, Hanada H, Nonaka M, Nakajima Y, Kobayashi M, Nakajima R.  
632 Effect of genistein and daidzein on the proliferation and differentiation of human  
633 preadipocyte cell line. *J Agric Food Chem.* 2010; 58(9): 5821-5827.  
634 <https://doi.org/10.1021/jf903911e>

- 635 37. Subramanian S, Abarna A, Thamizhiniyan V. Antihyperglycemic, antioxidant and  
636 antidyslipidemic properties of *Hemidesmus indicus* root extract studied in alloxan-  
637 induced experimental diabetes in rats. *Int J Pharm Sci Res.* 2012; 3(1): 227-234
- 638 38. Wasnich RD. Perspective on fracture risk and phalangeal bone mineral density. *J Clin*  
639 *Densitom.* 1998; 1(3): 259-268. <https://doi.org/10.1385/jcd:1:3:259>
- 640 39. Heine PA, Taylor JA, Iwamoto GA, Lubahn DB, Cooke PS. Increased adipose tissue in  
641 male and female estrogen receptor-alpha knockout mice. *Proc Natl Acad Sci.* 2000;  
642 97(23): 12729-12734. <https://doi.org/10.1073/pnas.97.23.12729>
- 643 40. El-Shitany NA, Hegazy S, El-Desoky K. Evidences for antiosteoporotic and selective  
644 estrogen receptor modulator activity of silymarin compared with ethinylestradiol in  
645 ovariectomized rats. *Phytomedicine* 2010; 17(2): 116-125.  
646 <https://doi.org/10.1016/j.phymed.2009.05.012>
- 647 41. Omi N, Ezawa I. The effect of ovariectomy on bone metabolism in rats. *Bone* 1995; 17(4  
648 Suppl) 163S-168S. [https://doi.org/10.1016/8756-3282\(95\)00329-c](https://doi.org/10.1016/8756-3282(95)00329-c)
- 649 42. Arjmandi BH, Alekel L, Hollis BW, Amin D, Stacewicz-Sapuntzakis M, Guo P, Kukreja  
650 SC. Dietary soybean protein prevents bone loss in an ovariectomized rat model of  
651 osteoporosis. *J Nutr.* 1996; 126(1): 161-167. <https://doi.org/10.1093/jn/126.1.161>
- 652 43. Powers CN, Setzer WN. A molecular docking study of phytochemical estrogen mimics  
653 from dietary herbal supplements. *In Silico Pharmacol.* 2015; 3: 4.  
654 <https://doi.org/10.1186/s40203-015-0008-z>
- 655 44. Ishimi Y, Arai N, Wang X, Wu J, Umegaki K, Miyaura C, Takeda A, Ikegami S.  
656 Difference in effective dosage of genistein on bone and uterus in ovariectomized mice.

- 657 Biochem Biophys Res Commun. 2000; 274(3): 697-701.  
658 <https://doi.org/10.1006/bbrc.2000.3175>
- 659 45. Picherit C, Coxam V, Bennetau-Pelissero C, Kati-Coulibaly S, Davicco MJ, Lebecque P,  
660 Barlet JP. Daidzein is more efficient than genistein in preventing ovariectomy-induced  
661 bone loss in rats. J Nutr. 2000; 130(7): 1675-1681. <https://doi.org/10.1093/jn/130.7.1675>
- 662 46. Gaete L, Tchernitchin AN, Bustamante R, Villena J, Lemus I, Gidekel M, Cabrera G,  
663 Astorga P. Daidzein-estrogen interaction in the rat uterus and its effect on human breast  
664 cancer cell growth. J Med Food 2012; 15(12): 1081-1090.  
665 <https://doi.org/10.1089/jmf.2011.0322>

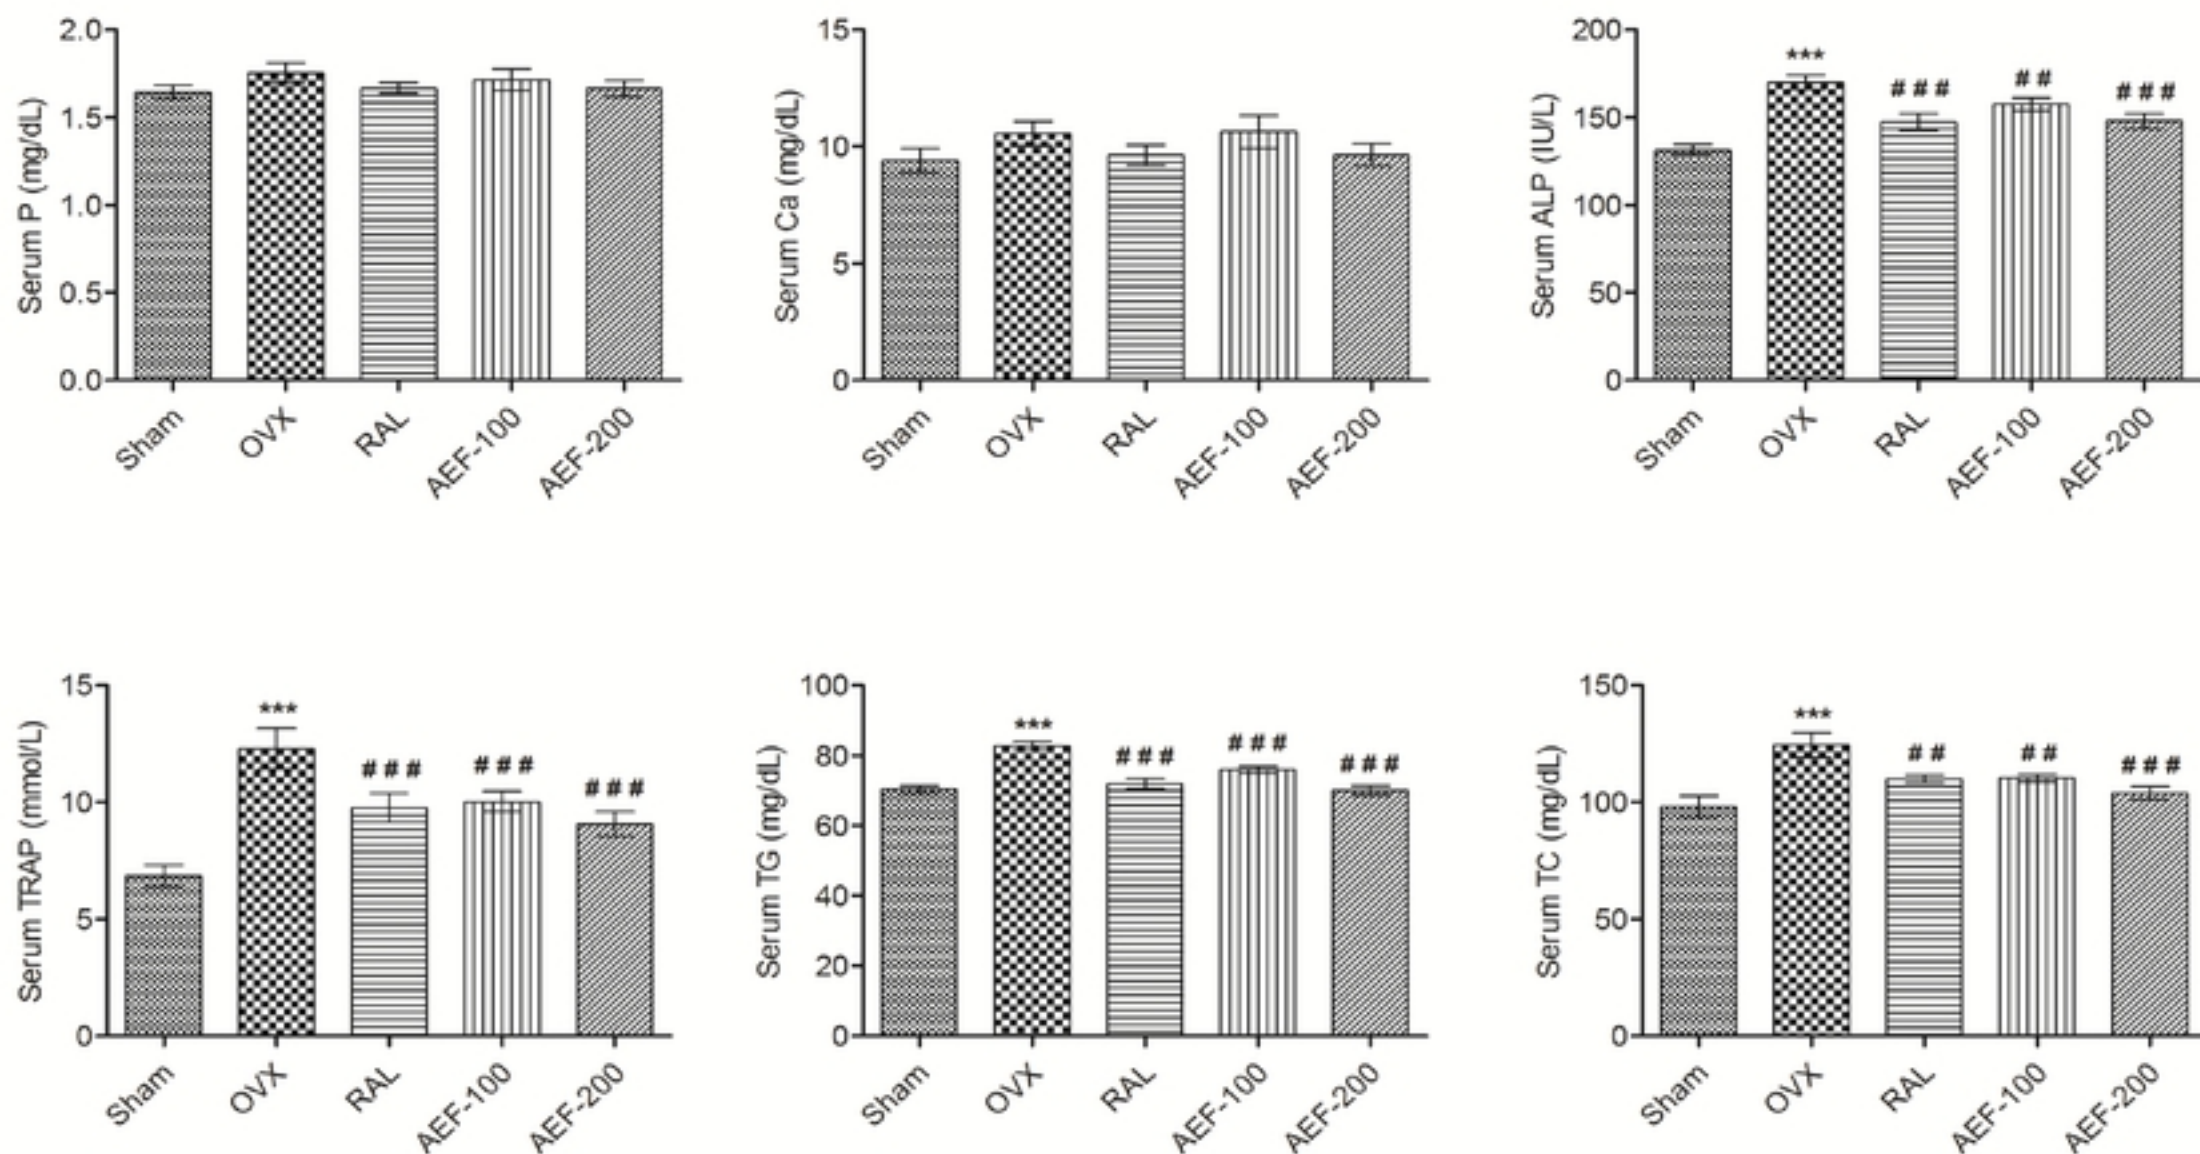

**Figure 1:** Effect of AEF from *P. tuberosa* on biochemical parameters of serum. Data were average  $\pm$  SEM (n=6). \*\*\* p < 0.001 significantly different from sham control group. ## p < 0.01, ### p < 0.001 significantly different from OVX group. Ca, calcium; P, phosphorus; ALP, alkaline phosphatase; TRAP, tartrate resistant acid phosphatase; TG, triglycerides; TC, total cholesterol.



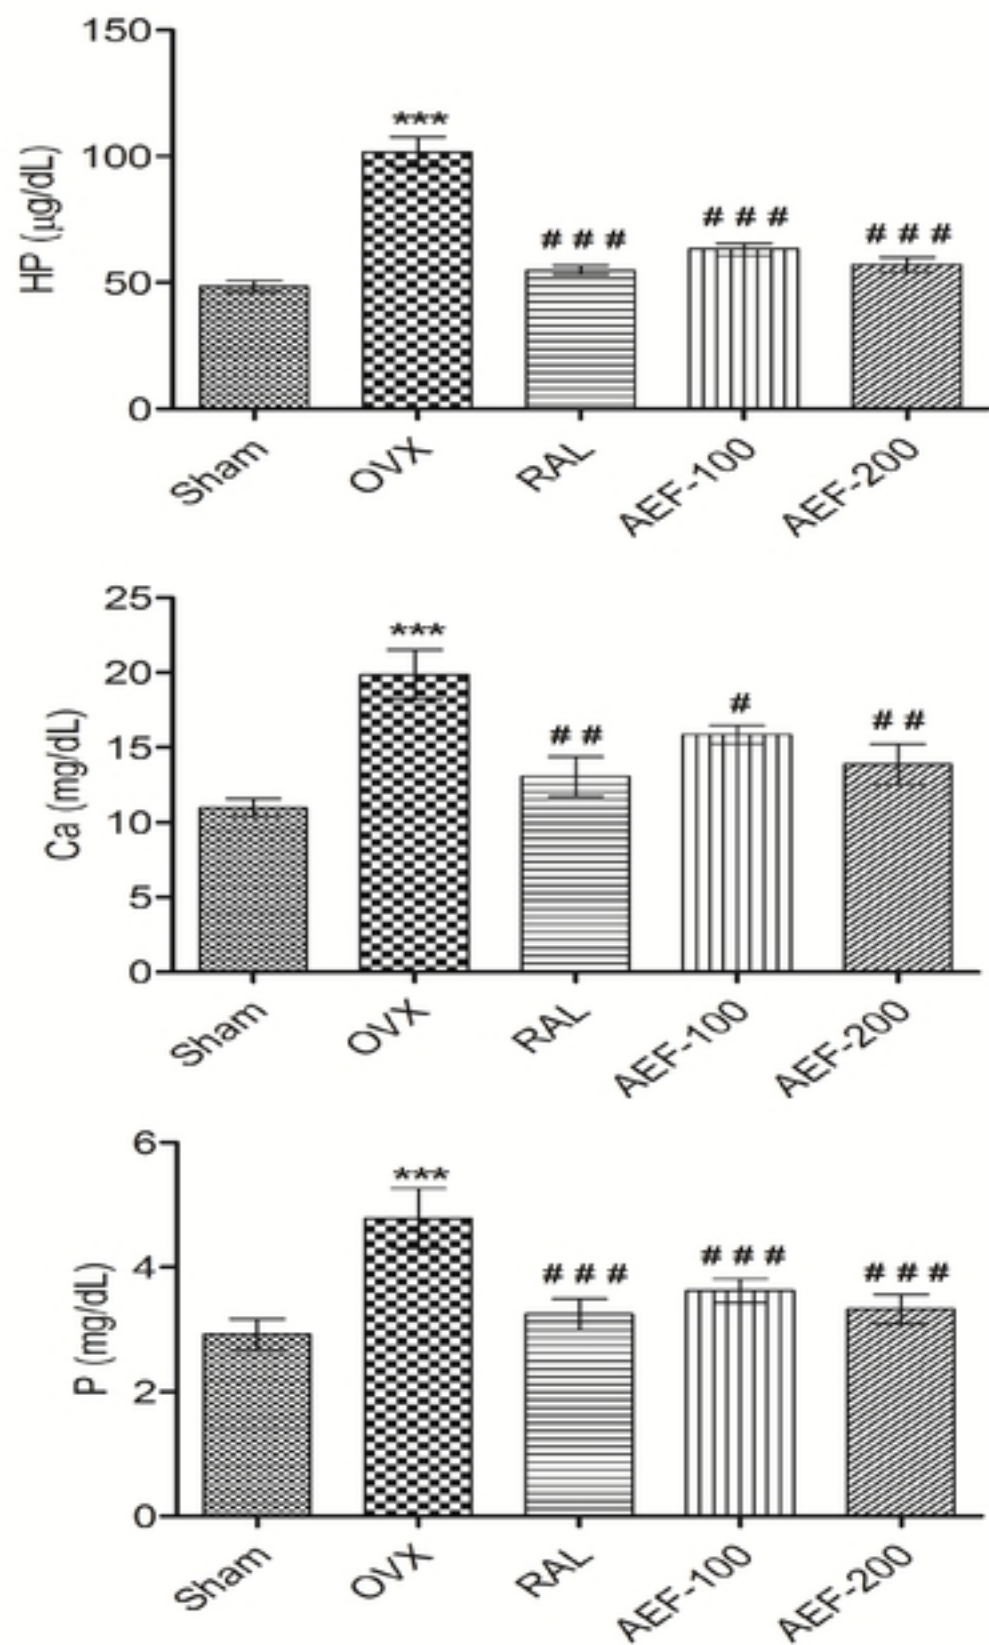

**Figure 2:** Effect of AEF from *P. tuberosa* on biochemical parameters of urine. Data were average  $\pm$  SEM (n=6). \*\*\* p < 0.01 significantly different from sham control group. # p < 0.05, ## p < 0.01, ### p < 0.001 significantly different from OVX group. Ca, calcium; P, phosphorus; HP, hydroxyproline.

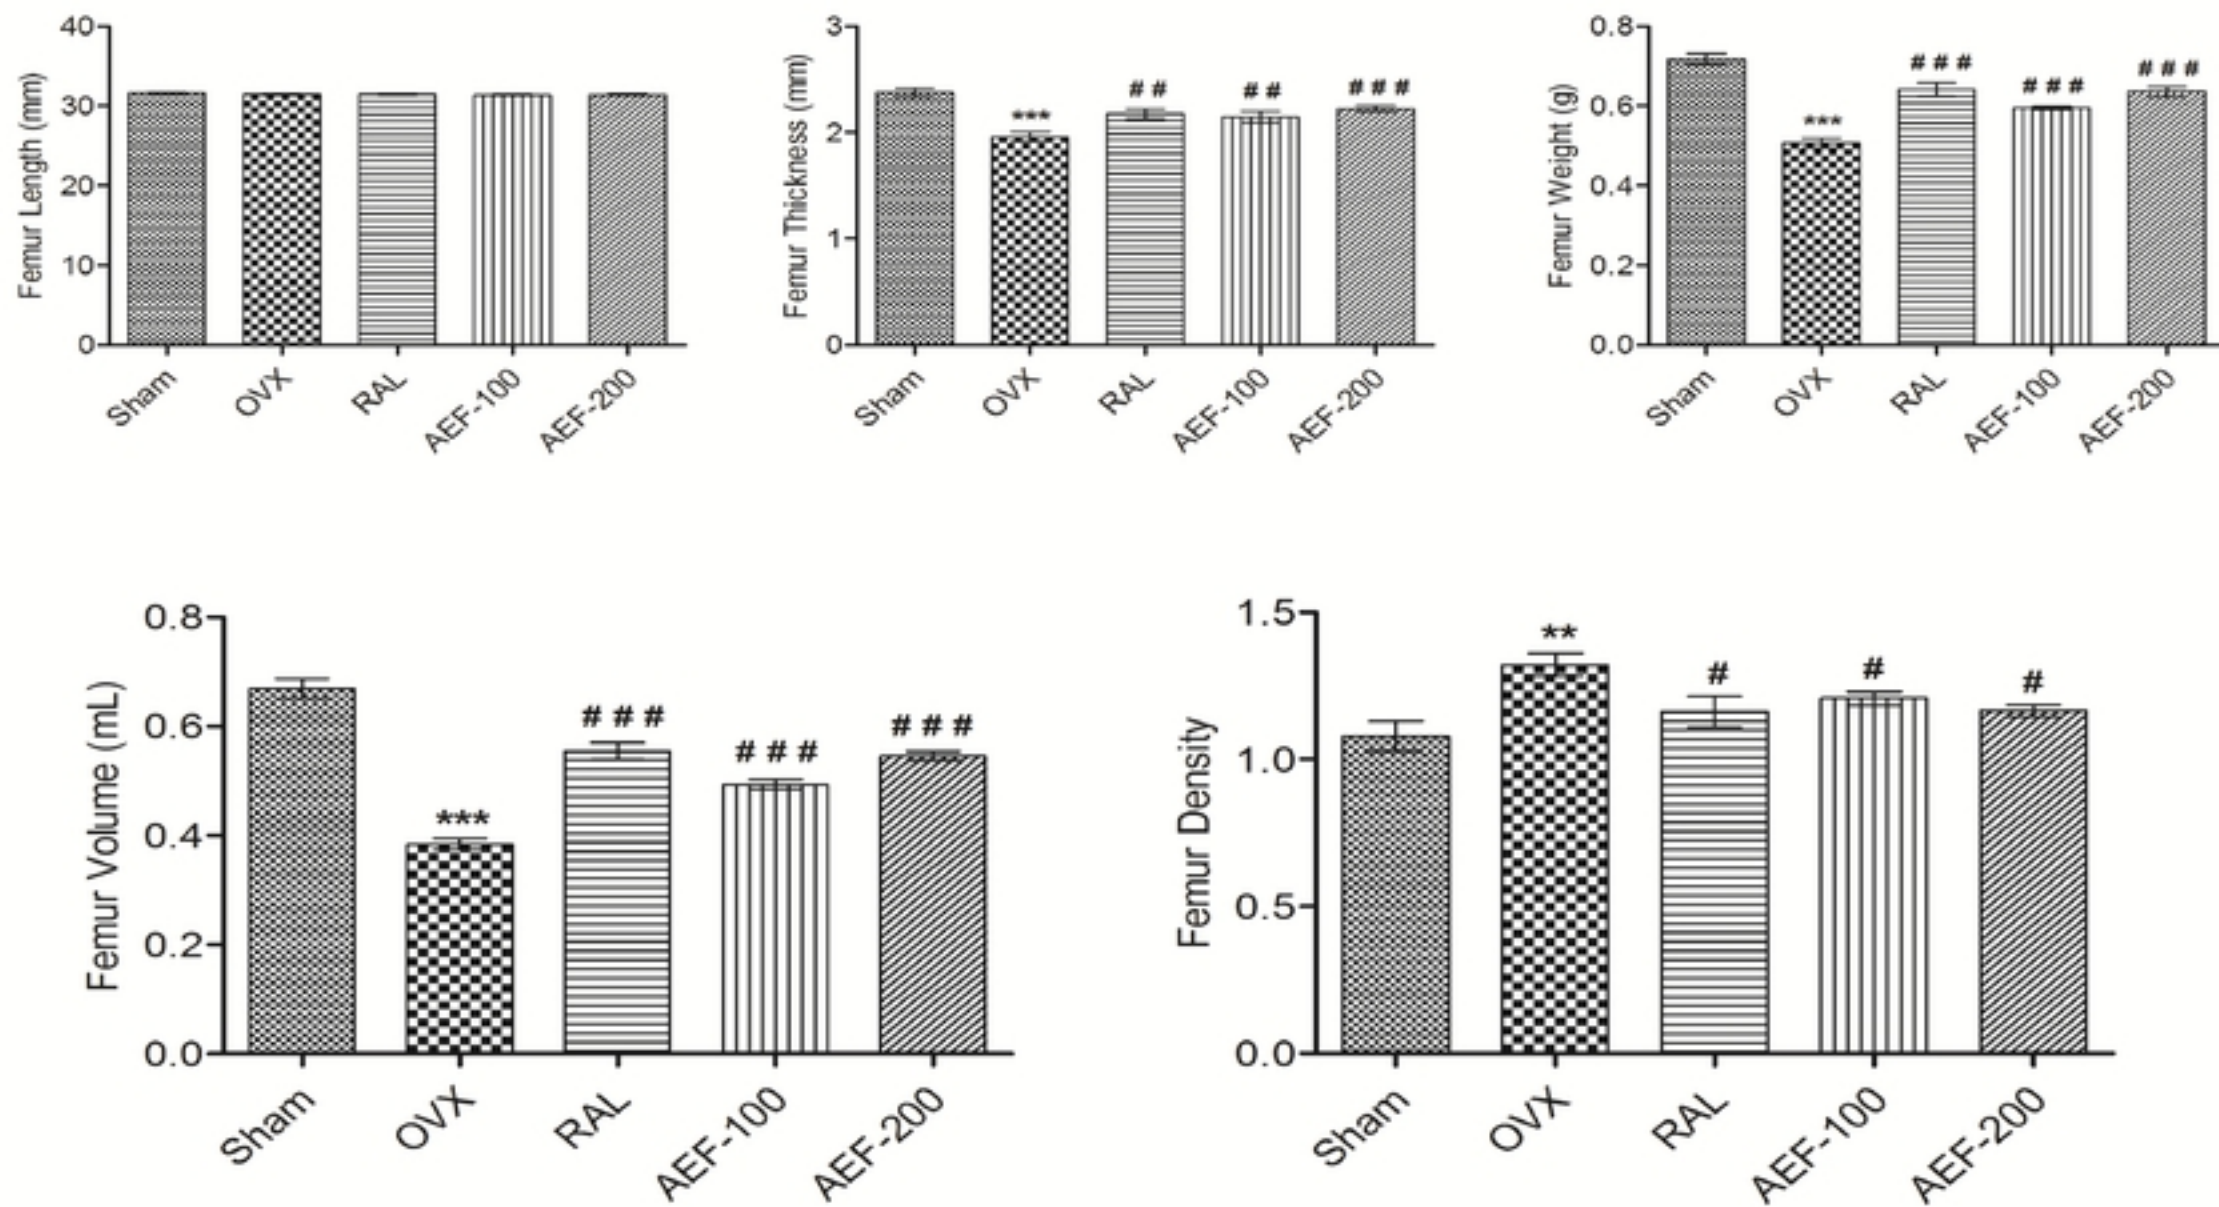

**Figure 3:** Effect of AEF from *P. tuberosa* on femur biomechanical parameters. Data were average  $\pm$  SEM (n=6). \*\*  $p < 0.01$ , \*\*\*  $p < 0.001$  significantly different from sham control group. #  $p < 0.05$ , ##  $p < 0.01$ , ###  $p < 0.001$  significantly different from OVX group.

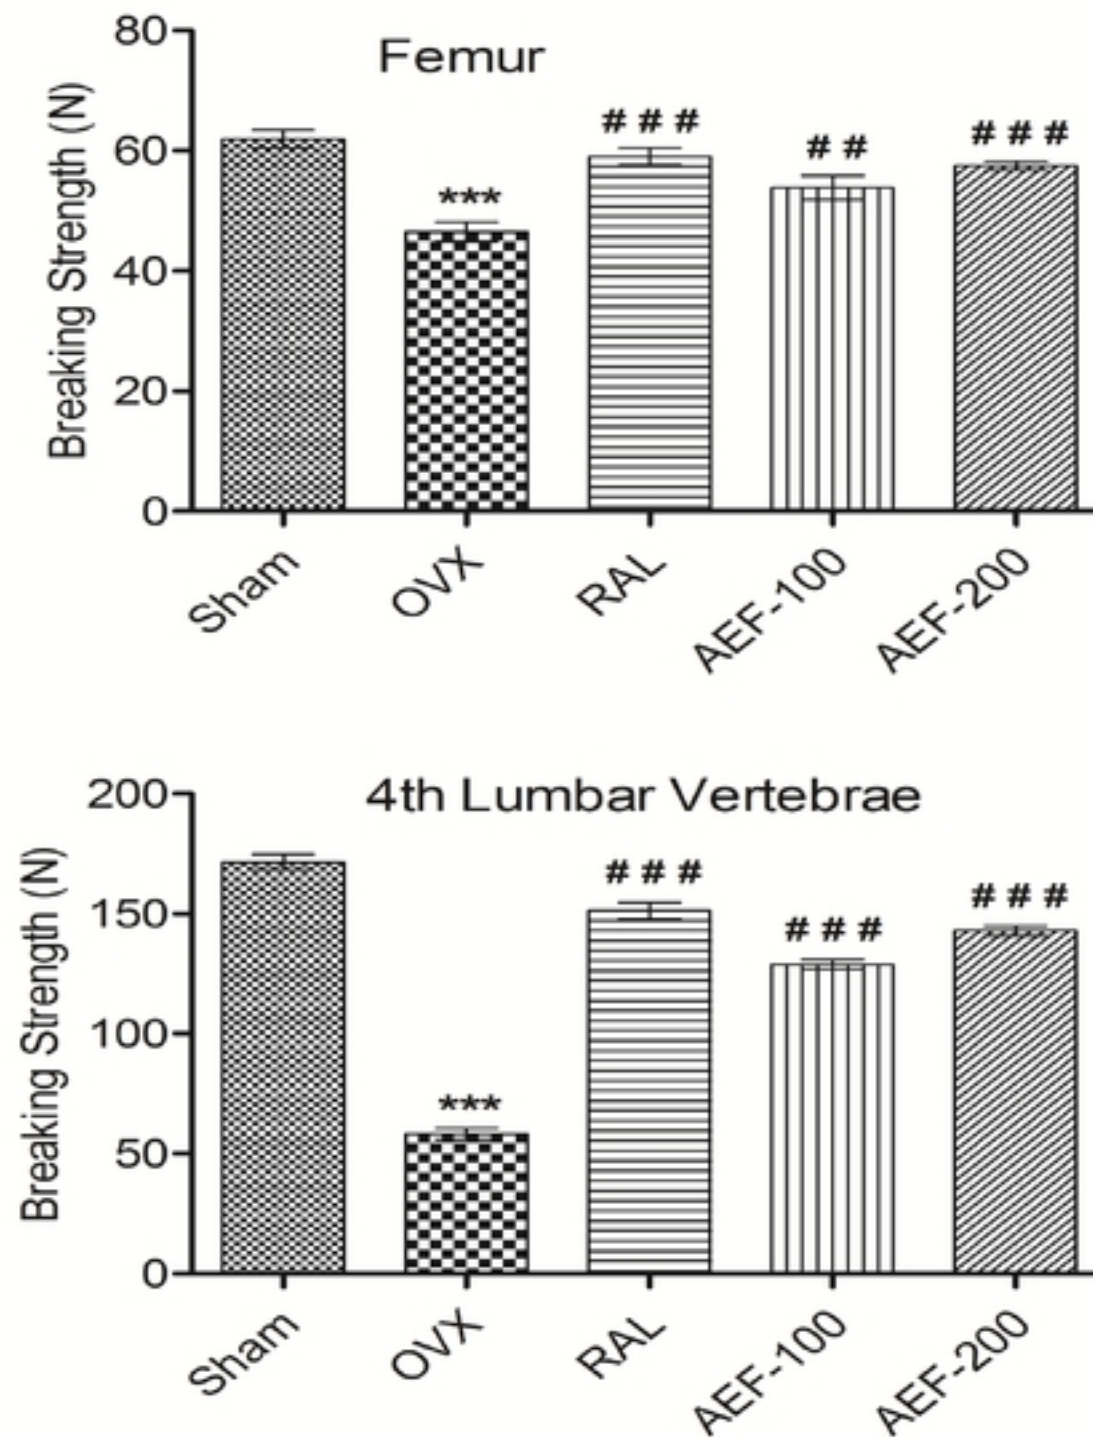

**Figure 4:** Effect of AEF from *P. tuberosa* on breaking strength of femur and 4<sup>th</sup> lumbar vertebrae. Data were average  $\pm$  SEM (n=6). \*\*\*  $p < 0.001$  significantly different from sham control group. ##  $p < 0.01$ , ###  $p < 0.001$  significantly different from OVX group.

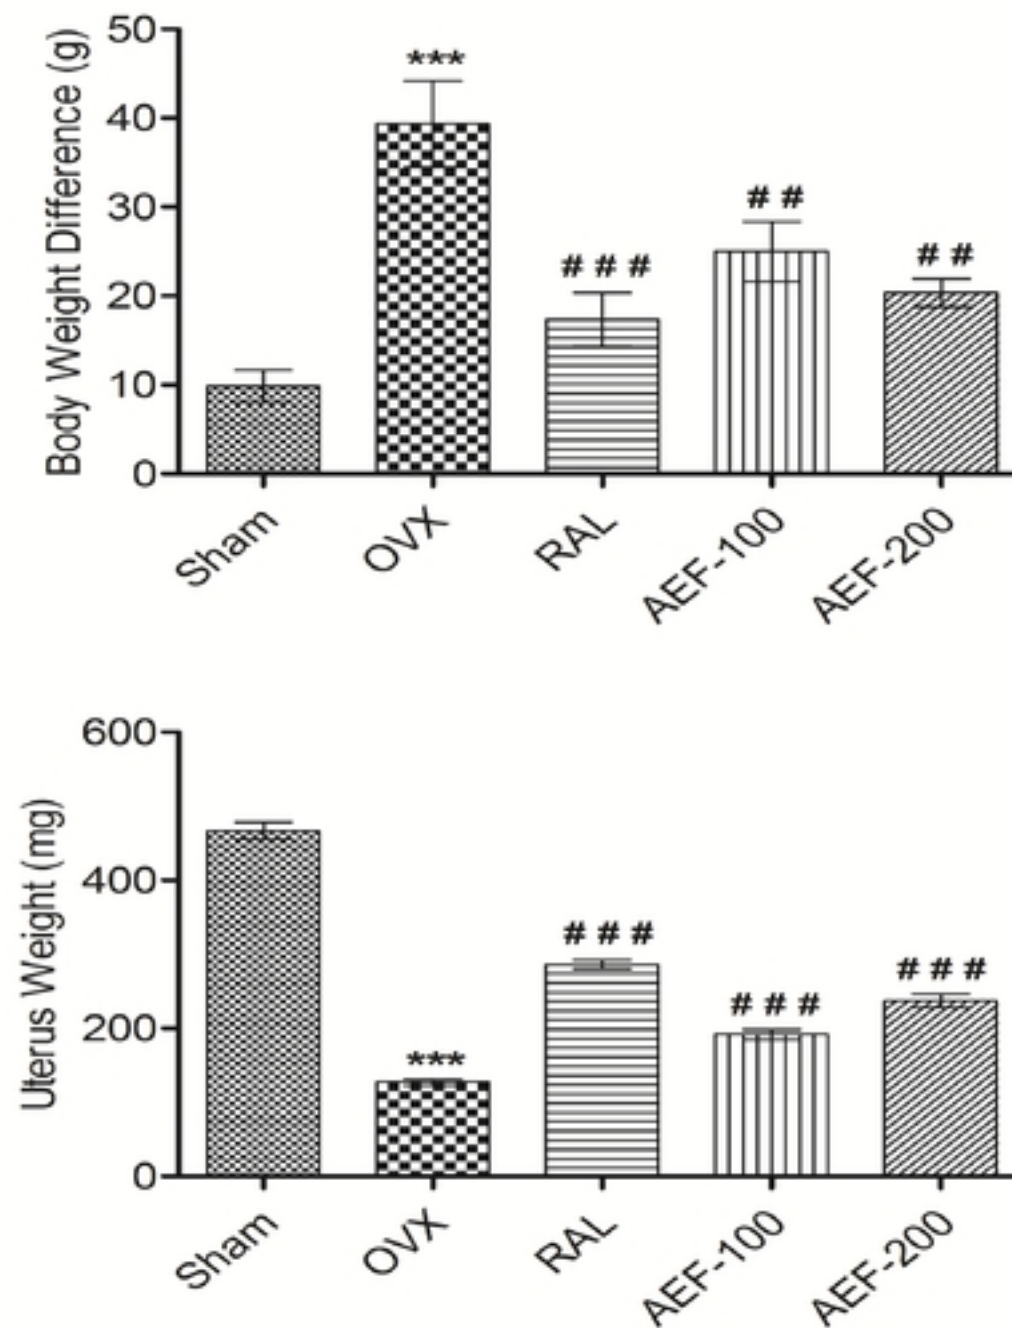

**Figure 5:** Effect of AEF from *P. tuberosa* on body and uterus weight. Data were average  $\pm$  SEM (n=6). \*\*\*  $p < 0.001$  significantly different from Sham control group. ##  $p < 0.01$ , ###  $p < 0.001$  significantly different from OVX group.

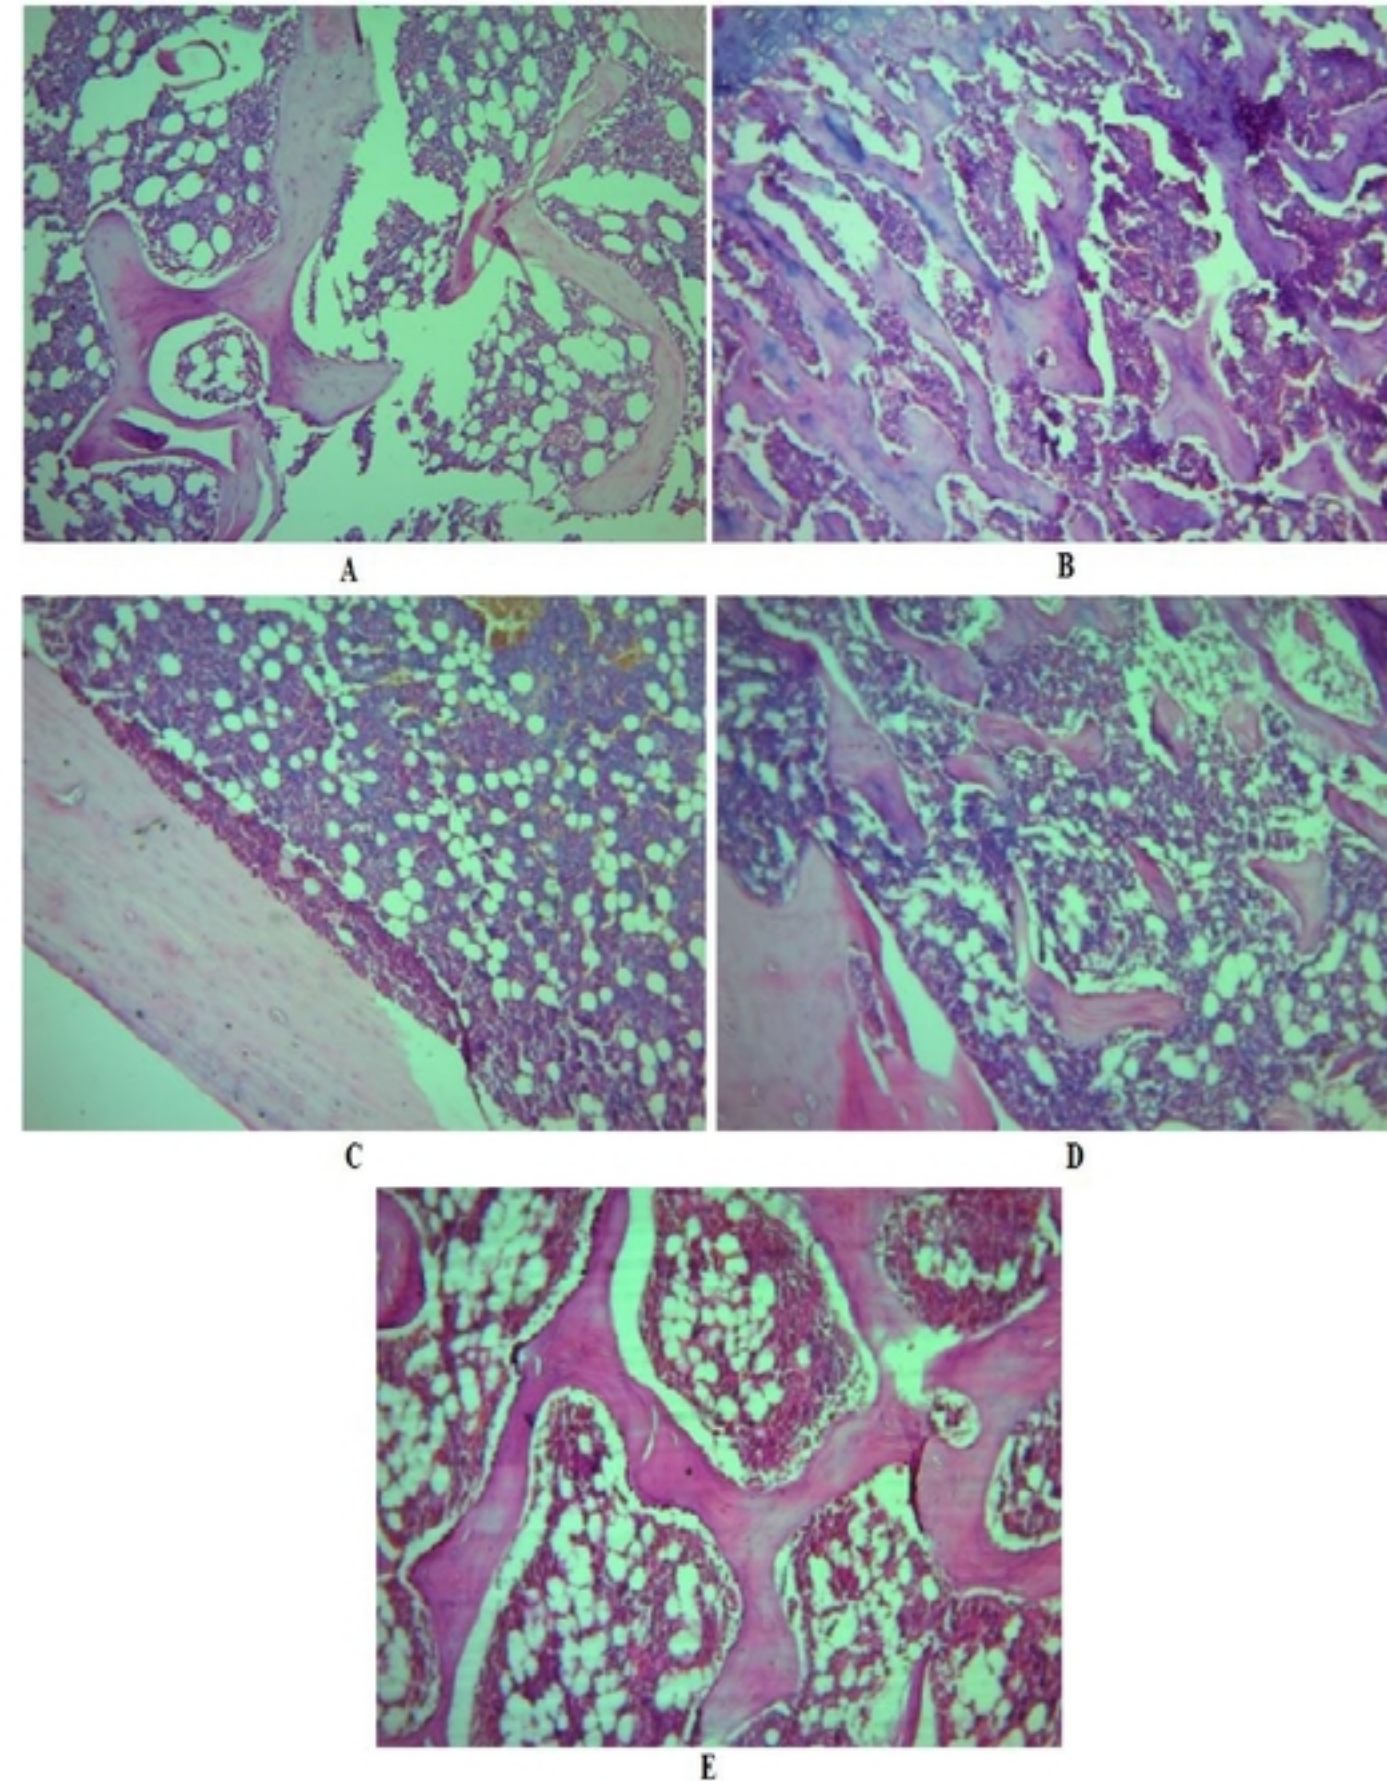

**Figure 6:** Effect of AEF of *P. tuberosa* on histopathology of the femur. **A**, Photomicrography of the femur of sham control group showing typical bone architecture; **B**, Photomicrography of the femur of OVX control group showing disruption of trabeculae; **C**, Photomicrography of the femur of raloxifene treated group showing improved trabecular thickness, and compactness of cells indicating mineralization of bone; **D**, Photomicrography of the femur of AEF-100 mg/kg treated group showing the improved trabecular thickness and bone architecture; **E**, Photomicrography of the femur of AEF-200 mg/kg treated group showing the restoration of typical bone architecture and increase in width of trabeculae.

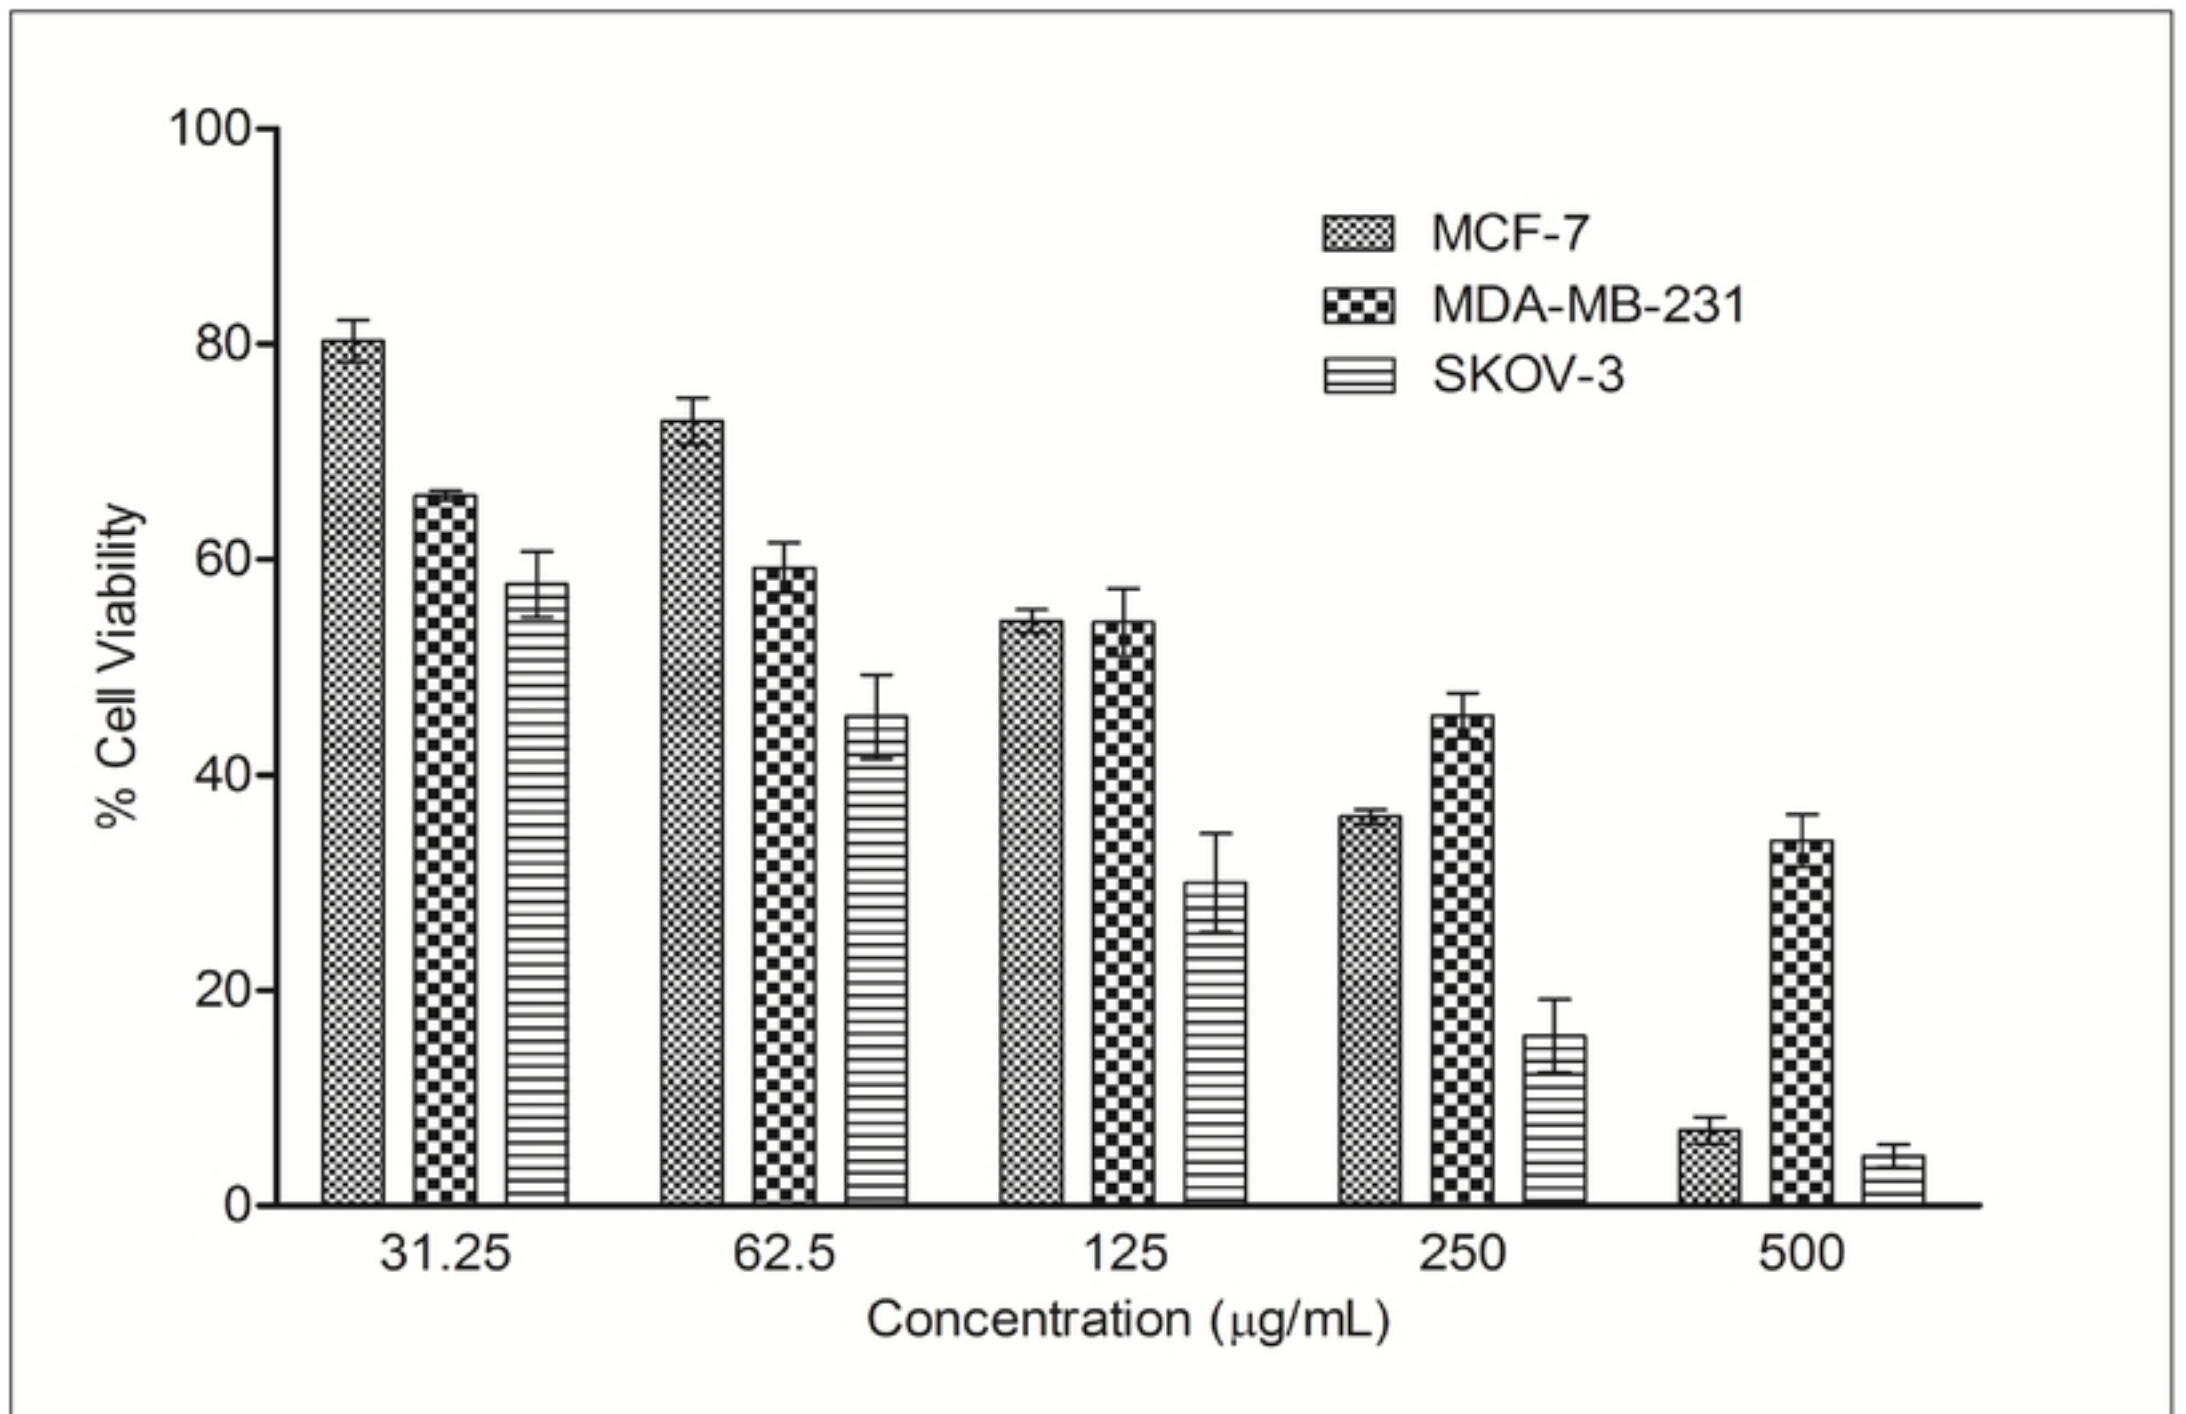

**Figure 7:** *In vitro* cytotoxicity of AEF of *P. tuberosa* against different cancer cell lines. Values are mean  $\pm$  SEMs (n=3).

Figure

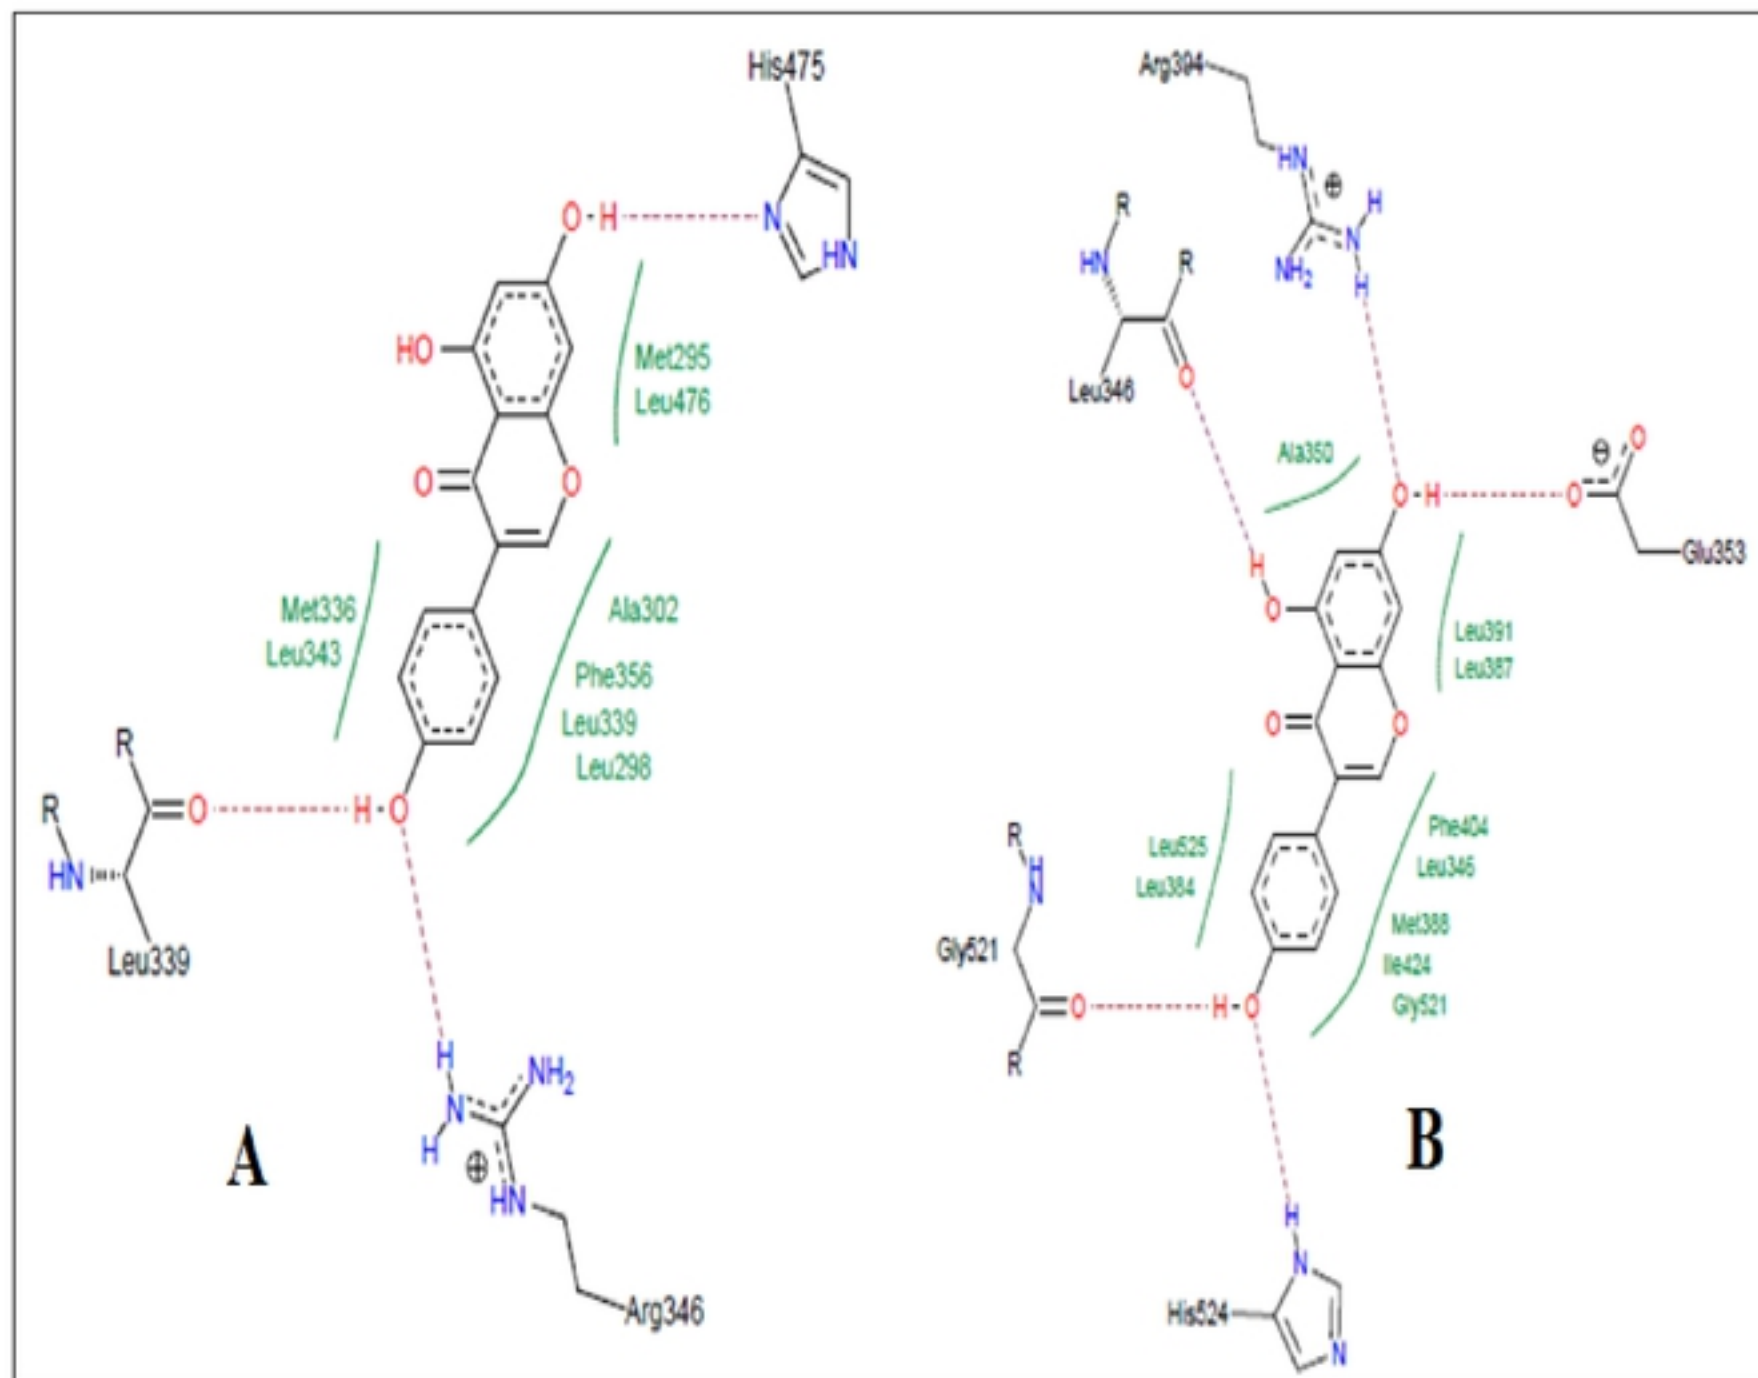

**Figure 8:** Docking study of genistein in estrogen receptors. **A**, Co-crystallized ligand of 1x76 (genistein) showing hydrogen bond with Arg346, Leu339, and His475. Hydrophobic interactions were also seen near the benzene rings with different amino acid residues of estrogen receptor  $\alpha$  (PDB: 1x76). The ligand showed a docking score of -26.1648. **B**, Co-crystallized ligand of 1x7R (genistein) showing hydrogen bond with Leu346, Arg394, Gly521, Glu353 and His524. Hydrophobic interactions were also seen near the benzene rings with different amino acid residues of estrogen receptor  $\beta$  (PDB: 1x7R). The ligand showed a docking score of -32.4084.

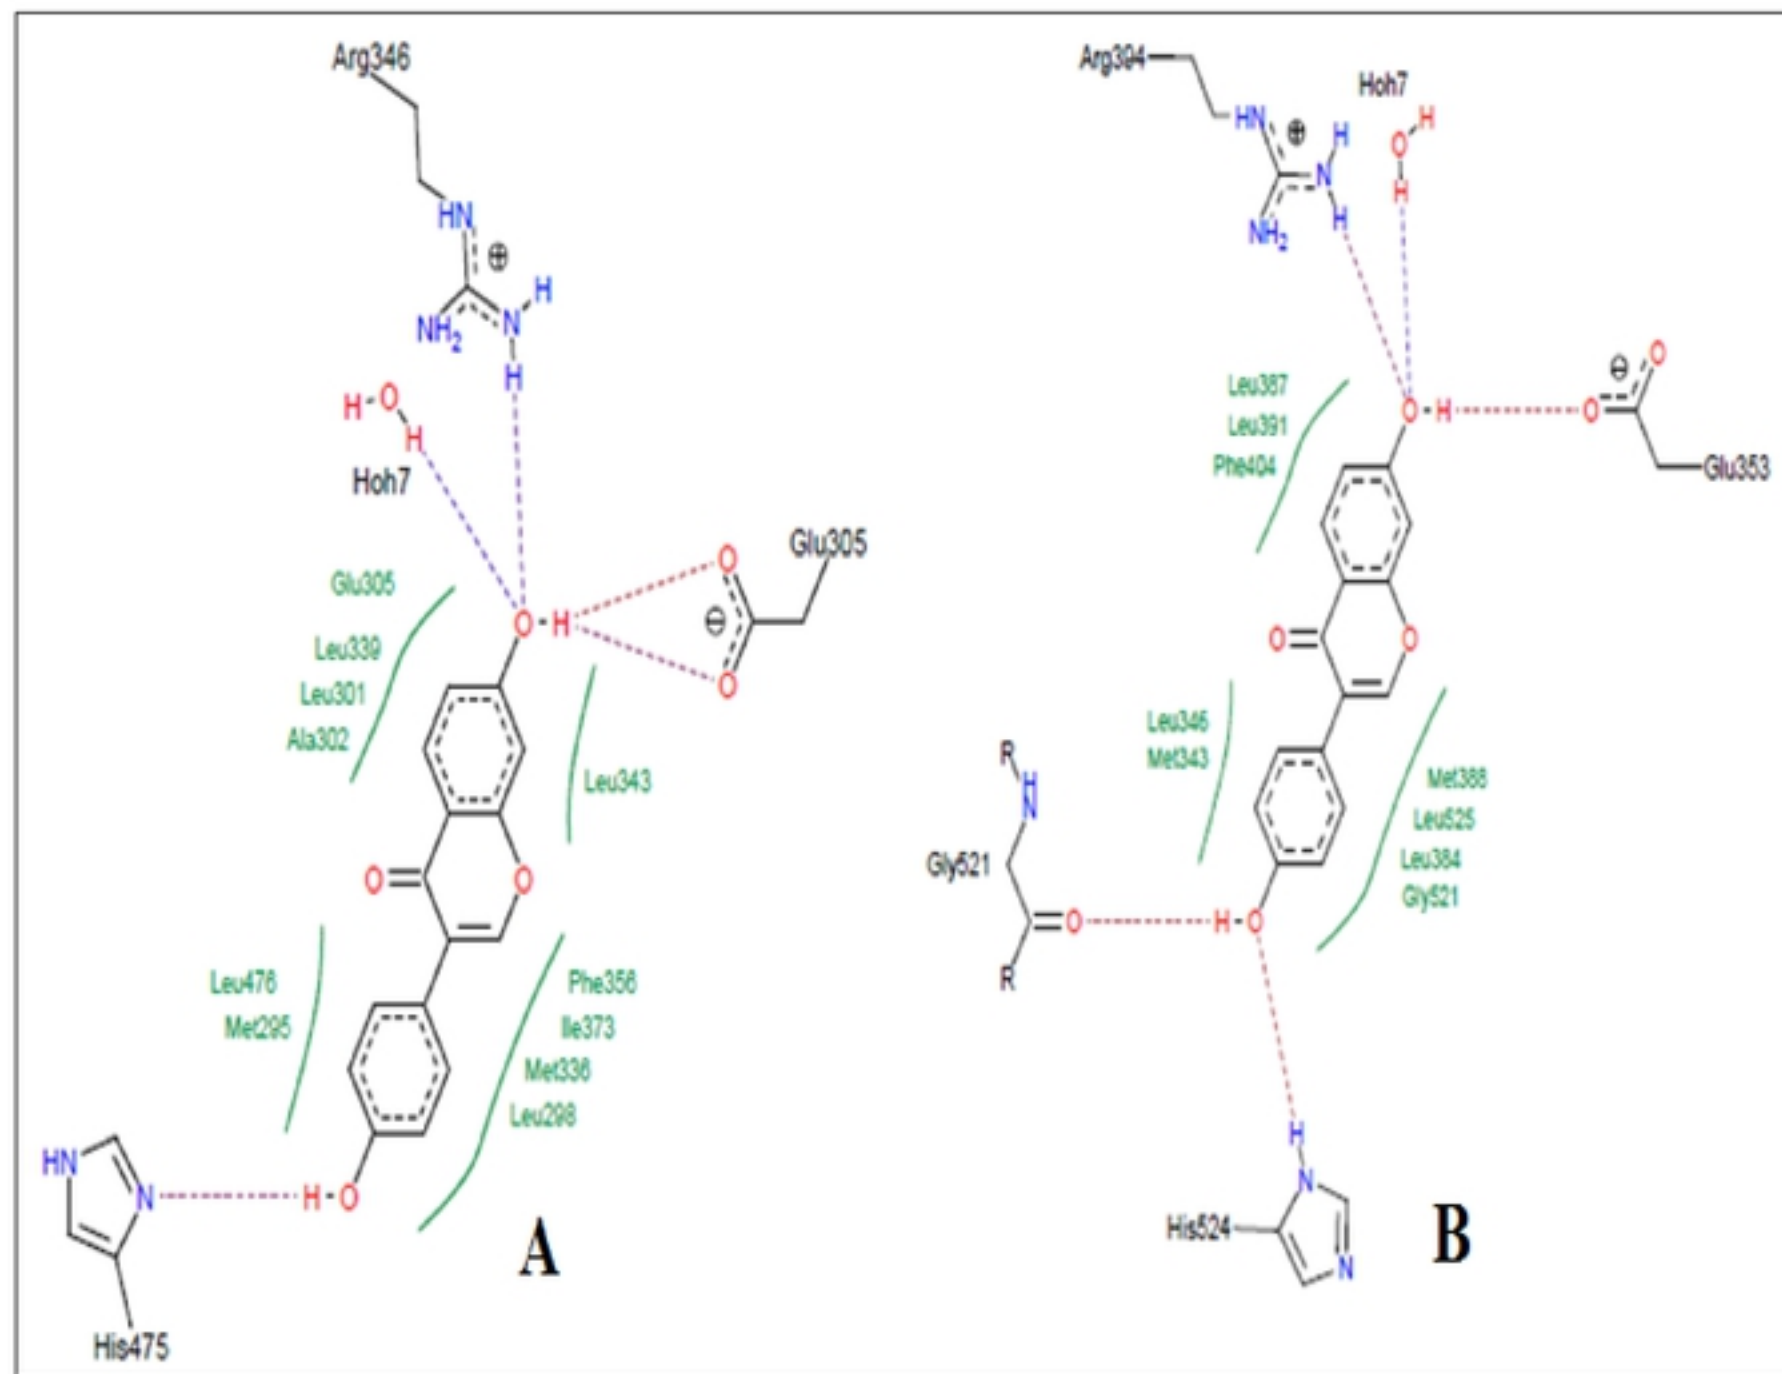

**Figure 9:** Docking study of daidzein in estrogen receptors. **A**, Docking pose of daidzein in estrogen receptor  $\alpha$  (PDB: 1x76) active site with a docking score of -28.3129. Daidzein formed hydrogen bond with Arg346, Glu305, and His475. Hydrophobic interactions were also seen near the benzene rings with different amino acid residues of estrogen receptor  $\alpha$  (PDB: 1x76). **B**, Docking pose of daidzein in estrogen receptor  $\beta$  (1 x 7R) active site with a docking score of -31.8923. Daidzein showed hydrogen bond with Arg394, Glu353, Gly521 and His524. Hydrophobic interactions were also seen near the benzene rings with different amino acid residues of estrogen receptor  $\beta$  (PDB: 1x7R).
